# Supplementary material
Source: Research Square preprint supplement (doi:10.21203/rs.3.rs-9076126/v1)
Supplement: Supplementary file 1 [file 7382f64e5fe93dadc3d7f2a4.xlsx]

## Sheet: Sheet1
	Garnet data
	Age	2sd	P	T	Method		Notes	Reference	DOI
	3719	24	0.64	597	Sm-Nd	Isua Greenstone Belt, SW Greenland	Continental	Blichert-Toft & Robert Frei (2001)	https://doi.org/10.1016/S0016-7037(01)00680-9
	3717	24	0.68	552	Sm-Nd	Isua Greenstone Belt, SW Greenland	Continental	Blichert-Toft & Robert Frei (2001)	https://doi.org/10.1016/S0016-7037(01)00680-10
	3714	24	0.67	591	Sm-Nd	Isua Greenstone Belt, SW Greenland	Continental	Blichert-Toft & Robert Frei (2001)	https://doi.org/10.1016/S0016-7037(01)00680-11
	3711	24	0.51	576	Sm-Nd	Isua Greenstone Belt, SW Greenland	Continental	Blichert-Toft & Robert Frei (2001)	https://doi.org/10.1016/S0016-7037(01)00680-12
	3635	5	0.5	630	Lu-Hf	Itsaq Gneiss, SW Greenland	Continental	This study
	3233	17	0.85	640	Lu-Hf	Stolzburg Terrane, Barberton Granite-Greenstone Belt, South Africa	Continental	Cutts et al. (2014)	https://doi.org/10.1130/B30807.1
	2710	5	0.725	760	Lu-Hf	Pikwitonei Granulite Domain, Superior Province, Canada	Continental	Smit et al. (2013)	https://doi.org/10.1016/j.epsl.2013.08.046
	2705	22	0.725	760	Lu-Hf	Pikwitonei Granulite Domain, Superior Province, Canada	Continental	Smit et al. (2013)	https://doi.org/10.1016/j.epsl.2013.08.046
	2699	10	0.5	600	Lu-Hf	Storø Au deposit, SW Greenland	Continental	Szilas et al. (2020)	https://doi.org/10.1016/j.oregeorev.2020.103476
	2697	8	0.66	690	Lu-Hf	Storø Au deposit, SW Greenland	Continental	Szilas et al. (2020)	https://doi.org/10.1016/j.oregeorev.2020.103476
	2651	6.9	0.5	600	Lu-Hf	Storø Au deposit, SW Greenland	Continental	Szilas et al. (2020)	https://doi.org/10.1016/j.oregeorev.2020.103476
	2649	7	0.5	600	Lu-Hf	Storø Au deposit, SW Greenland	Continental	Szilas et al. (2020)	https://doi.org/10.1016/j.oregeorev.2020.103476
	2646	13	0.66	690	Lu-Hf	Storø Au deposit, SW Greenland	Continental	Szilas et al. (2020)	https://doi.org/10.1016/j.oregeorev.2020.103476
	2632	16	0.75	760	Sm-Nd	Pikwitonei Granulite Domain, Superior Province, Canada	Continental	Smit et al. (2013)	https://doi.org/10.1016/j.epsl.2013.08.046
	2629	4	1.3	680	Lu-Hf	Acasta Gneiss Complex, Slave Craton, Canada	Continental	This study
	2605	9	0.75	760	Sm-Nd	Pikwitonei Granulite Domain, Superior Province, Canada	Continental	Mezger et al. (1992)	https://doi.org/10.1016/0012-821X(92)90141-H
	2605	9	0.75	760	Sm-Nd	Pikwitonei Granulite Domain, Superior Province, Canada	Continental	Mezger et al. (1992)	https://doi.org/10.1016/0012-821X(92)90141-H
	2566.9	4.4	1	800	Lu-Hf	Tasiuyak Complex, Transhudson Orogen, Canada	Continental	Godet et al. (2021)	https://doi.org/10.1111/jmg.12599
	2506	6	0.9	800	Lu-Hf	Snowbird tectonic zone, Canada	Continental	Graziani et al. (2022)	https://doi.org/10.1016/j.precamres.2022.106817
	2434	17	1.5	840	Lu-Hf	Kanjamalai, Dharwar Craton margin, southern India	Oceanic	Noack et al. (2013)	https://doi.org/10.1016/j.precamres.2013.04.018
	2412	10	1	750	Sm-Nd	Gawler Craton, Australia	Continental	Dutch & Hand (2009)	https://doi.org/10.1007/s00410-009-0418-1
	2405	17	0.9	800	Lu-Hf	Snowbird tectonic zone, Canada	Continental	Graziani et al. (2022)	https://doi.org/10.1016/j.precamres.2022.106818
	2403	43	0.9	800	Lu-Hf	Napier Metamorphic Complex, Antarctica	Continental	Choi et al. (2006)	https://doi.org/10.1016/j.epsl.2006.04.012
	2370.1	4.6	0.85	742	Sm-Nd	Gawler Craton, Australia	Continental	Dutch & Hand (2009)	https://doi.org/10.1007/s00410-009-0418-2
	2365	8.1	1.05	736	Sm-Nd	Gawler Craton, Australia	Continental	Dutch & Hand (2009)	https://doi.org/10.1007/s00410-009-0418-3
	2313	11	0.96	778	Sm-Nd	Gawler Craton, Australia	Continental	Dutch & Hand (2009)	https://doi.org/10.1007/s00410-009-0418-4
	2128	42	0.9	800	Lu-Hf	Napier Metamorphic Complex, Antarctica	Continental	Choi et al. (2006)	https://doi.org/10.1016/j.epsl.2006.04.012
	2111	3	1.2	700	Lu-Hf	Wholdaia Lake shear zone, Canada	Continental	Thiessen et al. (2019)	https://doi.org/10.1130/G45979.1
	2096	74	0.79	812	Sm-Nd	Gyeonggi and Yeongnam massifs, Korea	Continental	Sagong et al. (2003)	https://doi.org/10.1016/S0301-9268(02)00215-2
	2018	10	0.78	635	Lu-Hf	Thelon Tectonic Zone, Canada	Continental	Berman et al. (2023)	https://doi.org/10.1139/cjes-2022-0151
	2014	10	0.7	830	Lu-Hf	Thelon Tectonic Zone, Canada	Continental	Berman et al. (2023)	https://doi.org/10.1139/cjes-2022-0150
	1994	9	1.9	800		Usagaran Belt, Tanzania	Continental	Tamblyn et al. (2021)	https://doi.org/10.1016/j.lithos.2020.105890
	1967	57	0.52	664	Sm-Nd	Gyeonggi and Yeongnam massifs, Korea	Continental	Sagong et al. (2003)	https://doi.org/10.1016/S0301-9268(02)00215-3
	1961	31	2.05	700	Lu-Hf	Belomorian Province, Kola Peninsula, Russia	Continental	Yu et al. (2019)	https://doi.org/10.1016/j.lithos.2018.12.032
	1959	12	0.6	750	Lu-Hf	New Quebec Orogen, Canada	Continental	Godet et al. (2020)	https://doi.org/10.1016/j.precamres.2020.105675
	1928	20	0.57	679	Sm-Nd	Gyeonggi and Yeongnam massifs, Korea	Continental	Sagong et al. (2003)	https://doi.org/10.1016/S0301-9268(02)00215-4
	1915	10	0.61	730	Lu-Hf	Thelon Tectonic Zone, Canada	Continental	Berman et al. (2023)	https://doi.org/10.1139/cjes-2022-0152
	1914.5	3.4	1.6	750	Lu-Hf	Snowbird tectonic zone, Canada	Added later	Cutts et al. (2024)	https://doi.org/10.1111/ter.12709
	1912	37	0.75	860	Lu-Hf	Thelon Tectonic Zone, Canada	Continental	Berman et al. (2023)	https://doi.org/10.1139/cjes-2022-0149
	1907	11	0.57	885	Lu-Hf	Thelon Tectonic Zone, Canada	Continental	Berman et al. (2023)	https://doi.org/10.1139/cjes-2022-0148
	1904	19	1.2	860	Lu-Hf	Snowbird tectonic zone, Canada	Continental	Graziani et al. (2022)	https://doi.org/10.1016/j.precamres.2022.106819
	1901	10	0.54	600	Lu-Hf	Thelon Tectonic Zone, Canada	Continental	Berman et al. (2023)	https://doi.org/10.1139/cjes-2022-0147
	1894	4	2.05	700	Lu-Hf	Belomorian Province, Kola Peninsula, Russia	Continental	Herwartz et al. (2012)	https://doi.org/10.1134/S1028334X12030130
	1890	33	0.9	750	Lu-Hf	Wholdaia Lake shear zone, Canada	Continental	Thiessen et al. (2019)	https://doi.org/10.1130/G45979.1
	1885	12	1.1	900	Lu-Hf	Tasiuyak Complex, Transhudson Orogen, Canada	Continental	Godet et al. (2021)	https://doi.org/10.1111/jmg.12599
	1872.5	4.9	1	820	Lu-Hf	Wholdaia Lake shear zone, Snowbird Orogen, Canada	Continental	Thiessen et al. (2020)	https://doi.org/10.1111/jmg.12556
	1872	9	0.75	850	Lu-Hf	Makhavinekh Lake Pluton, Labrador, Canada	Continental	Kelly et al. (2011)	https://doi.org/10.1111/j.1525-1314.2011.00946.x
	1846	76	1.04	831	Sm-Nd	Sulu orogen, China	Continental	Zhai et al. (2000)	https://doi.org/10.1016/S0024-4937(99)00082-1
	1836.6	4.6	1	800	Lu-Hf	New Quebec Orogen, Canada	Continental	Godet et al. (2020)	https://doi.org/10.1016/j.precamres.2020.105675
	1824	18	0.87	519	Sm-Nd	Sulu orogen, China	Continental	Zhai et al. (2000)	https://doi.org/10.1016/S0024-4937(99)00082-2
	1810	7	0.5	750	Sm-Nd	Svecofennian granite-migmatite zone, Finland	Continental	Mouri et al. (2005)	https://doi.org/10.1080/11035890501272123
	1804.4	7.5	0.9	625	Lu-Hf	New Quebec Orogen, Canada	Continental	Godet et al. (2020)	https://doi.org/10.1016/j.precamres.2020.105675
	1803	10	0.48	751	Sm-Nd	Svecofennian granite-migmatite zone, Finland	Continental	Mouri et al. (2005)	https://doi.org/10.1080/11035890501272123
	1802	6	0.43	762	Sm-Nd	Svecofennian granite-migmatite zone, Finland	Continental	Mouri et al. (2005)	https://doi.org/10.1080/11035890501272123
	1800	8	0.4	768	Sm-Nd	Svecofennian granite-migmatite zone, Finland	Continental	Mouri et al. (2005)	https://doi.org/10.1080/11035890501272123
	1798	10	0.48	800	Sm-Nd	Svecofennian granite-migmatite zone, Finland	Continental	Mouri et al. (2005)	https://doi.org/10.1080/11035890501272123
	1791	9	0.41	792	Sm-Nd	Svecofennian granite-migmatite zone, Finland	Continental	Mouri et al. (2005)	https://doi.org/10.1080/11035890501272123
	1750	30	0.81	482	Sm-Nd	Sulu orogen, China	Continental	Zhai et al. (2000)	https://doi.org/10.1016/S0024-4937(99)00082-2
	1743	79	1.34	851	Sm-Nd	Sulu orogen, China	Continental	Zhai et al. (2000)	https://doi.org/10.1016/S0024-4937(99)00082-2
	1682	27	0.67	725	Sm-Nd	Gyeonggi and Yeongnam massifs, Korea	Continental	Sagong et al. (2003)	https://doi.org/10.1016/S0301-9268(02)00215-4
	1606.5	2.4	0.9	580	Lu-Hf	Mt. Isa, Australia	Continental	Pourteau et al. (2018)	https://doi.org/10.1130/G45198.1
	1603.9	4.5	0.9	580	Lu-Hf	Mt. Isa, Australia	Continental	Pourteau et al. (2018)	https://doi.org/10.1130/G45198.2
	1597.9	5.8	0.9	580	Lu-Hf	Mt. Isa, Australia	Continental	Pourteau et al. (2018)	https://doi.org/10.1130/G45198.3
	1597.2	2.4	0.8	600	Lu-Hf	Georgetown Inlier, Australia	Continental	Volante et al. (2020)	https://doi.org/10.1111/jmg.12534
	1594.5	4.9	0.9	650	Lu-Hf	Georgetown Inlier, Australia	Continental	Volante et al. (2020)	https://doi.org/10.1111/jmg.12532
	1593.9	2.9	0.95	640	Lu-Hf	Georgetown Inlier, Australia	Continental	Volante et al. (2020)	https://doi.org/10.1111/jmg.12533
	1592	4.2	0.45	620	Lu-Hf	Georgetown Inlier, Australia	Continental	Volante et al. (2020)	https://doi.org/10.1111/jmg.12535
	1584	55	0.9	800	Lu-Hf	Napier Metamorphic Complex, Antarctica	Continental	Choi et al. (2006)	https://doi.org/10.1016/j.epsl.2006.04.012
	1489	55	0.9	800	Lu-Hf	Napier Metamorphic Complex, Antarctica	Continental	Choi et al. (2006)	https://doi.org/10.1016/j.epsl.2006.04.012
	1486	90	0.5	852	Sm-Nd	Windmill Islands, Antarctica	Continental	Möller et al. (2002)	https://doi.org/10.1007/s00531-002-0291-x
	1463	24	1.1	750	Lu-Hf	Belt-Purcell Supergroup, Idaho, USA	Continental	Zirakparvar et al. (2010)	https://doi.org/10.1139/E10-001
	1379	8	1.1	750	Lu-Hf	Belt-Purcell Supergroup, Idaho, USA	Continental	Zirakparvar et al. (2010)	https://doi.org/10.1139/E10-005
	1176	2.5	0.47	879	Sm-Nd	Windmill Islands, Antarctica	Continental	Möller et al. (2002)	https://doi.org/10.1007/s00531-002-0291-x
	1156	17	0.4	835	Sm-Nd	Windmill Islands, Antarctica	Continental	Möller et al. (2002)	https://doi.org/10.1007/s00531-002-0291-x
	1151	41	1	700	Lu-Hf	Belt-Purcell Supergroup, Idaho, USA	Continental	Zirakparvar et al. (2010)	https://doi.org/10.1139/E10-010
	1137	2.5	0.44	859	Sm-Nd	Windmill Islands, Antarctica	Continental	Möller et al. (2002)	https://doi.org/10.1007/s00531-002-0291-x
	1078	4	0.85	665	Lu-Hf	Belt-Purcell Supergroup, Idaho, USA	Continental	Zirakparvar et al. (2010)	https://doi.org/10.1139/E10-011
	1064	10	1	700	Lu-Hf	Belt-Purcell Supergroup, Idaho, USA	Continental	Zirakparvar et al. (2010)	https://doi.org/10.1139/E10-012
	1051	4	0.75	750	Sm-Nd	Pikwitonei Granulite Domain, Superior Province, Canada	Continental	Mezger et al. (1992)	https://doi.org/10.1016/0012-821X(92)90141-H
	1040	4	2	740	Lu-Hf	Northern Highland Terrane, Scotland	Continental	Bird et al. 2023	https://doi.org/10.1016/j.gsf.2023.101668
	1029	3	0.75	750	Sm-Nd	Pikwitonei Granulite Domain, Superior Province, Canada	Continental	Mezger et al. (1992)	https://doi.org/10.1016/0012-821X(92)90141-H
	1024	3	0.9	670	Lu-Hf	Belt-Purcell Supergroup, Idaho, USA	Continental	Zirakparvar et al. (2010)	https://doi.org/10.1139/E10-016
	1018	7	0.75	750	Sm-Nd	Pikwitonei Granulite Domain, Superior Province, Canada	Continental	Mezger et al. (1992)	https://doi.org/10.1016/0012-821X(92)90141-H
	1017	7	0.95	780	Sm-Nd	Pikwitonei Granulite Domain, Superior Province, Canada	Continental	Mezger et al. (1992)	https://doi.org/10.1016/0012-821X(92)90141-H
	1010	13	2	740	Sm-Nd	Northern Highland Terrane, Scotland	Continental	Bird et al. 2023	https://doi.org/10.1016/j.gsf.2023.101668
	988	12	1	900	Sm-Nd	Prydz Bay, Antarctica	Continental	Hensen & Zhou (1995)	https://doi.org/10.1130/0091-7613(1995)023<0225:ROIMIG>2.3.CO;2
	988	12	0.9	900	Sm-Nd	Prydz Bay, Antarctica	Continental	Hensen & Zhou (1995)	https://doi.org/10.1130/0091-7613(1995)023<0225:ROIMIG>2.3.CO;2
	956	12	0.68	715	Sm-Nd	Gyeonggi and Yeongnam massifs, Korea	Continental	Sagong et al. (2003)	https://doi.org/10.1016/S0301-9268(02)00215-2
	954	12	0.69	808	Sm-Nd	Gyeonggi and Yeongnam massifs, Korea	Continental	Sagong et al. (2003)	https://doi.org/10.1016/S0301-9268(02)00215-2
	941	4	0.94	865	Sm-Nd	Prydz Bay, Antarctica	Continental	Hensen & Zhou (1995)	https://doi.org/10.1130/0091-7613(1995)023<0225:ROIMIG>2.3.CO;2
	918.3	4.3	0.44	570	Lu-Hf	Karagwe-Ankole Belt, Central Africa	Continental	van Daele et al. (2020)	https://doi.org/10.1016/j.jafrearsci.2020.103783
	906	10	0.95	880	Sm-Nd	Prydz Bay, Antarctica	Continental	Hensen & Zhou (1995)	https://doi.org/10.1130/0091-7613(1995)023<0225:ROIMIG>2.3.CO;2
	903	4	0.98	860	Sm-Nd	Prydz Bay, Antarctica	Continental	Hensen & Zhou (1995)	https://doi.org/10.1130/0091-7613(1995)023<0225:ROIMIG>2.3.CO;2
	901	5	0.97	900	Sm-Nd	Prydz Bay, Antarctica	Continental	Hensen & Zhou (1995)	https://doi.org/10.1130/0091-7613(1995)023<0225:ROIMIG>2.3.CO;2
	891	34	0.44	570	Lu-Hf	Karagwe-Ankole Belt, Central Africa	Continental	van Daele et al. (2020)	https://doi.org/10.1016/j.jafrearsci.2020.103786
	881.6	7.9	0.44	570	Lu-Hf	Karagwe-Ankole Belt, Central Africa	Continental	van Daele et al. (2020)	https://doi.org/10.1016/j.jafrearsci.2020.103788
	859	4	0.99	890	Sm-Nd	Prydz Bay, Antarctica	Continental	Hensen & Zhou (1995)	https://doi.org/10.1130/0091-7613(1995)023<0225:ROIMIG>2.3.CO;2
	766.4	37	0.67	620	Sm-Nd	Northern Highland and Grampian terranes, Scotland	Continental	Bird et al. (2013)	https://doi.org/10.1144/jgs2012-083
	740	34	0.49	627	Sm-Nd	Gyeonggi and Yeongnam massifs, Korea	Continental	Sagong et al. (2003)	https://doi.org/10.1016/S0301-9268(02)00215-2
	648	3	0.6	750	Sm-Nd	Prydz Bay, Antarctica	Continental	Hensen & Zhou (1995)	https://doi.org/10.1130/0091-7613(1995)023<0225:ROIMIG>2.3.CO;2
	618	14	0.8	650	Lu-Hf	Western Gneiss Region, Norway	Continental	Cutts & Smit (2018)	https://doi.org/10.1002/2017TC004723
	617	12	0.3	525	Lu-Hf	Karagwe-Ankole Belt, Central Africa	Continental	van Daele et al. (2020)	https://doi.org/10.1016/j.jafrearsci.2020.103792
	616	7	0.47	564	Lu-Hf	Ross orogen, Antarctica	Continental	Hagen-Peter et al. (2016)	https://doi.org/10.1111/jmg.12182
	604.4	1.1	0.3	598	Lu-Hf	Karagwe-Ankole Belt, Central Africa	Continental	van Daele et al. (2020)	https://doi.org/10.1016/j.jafrearsci.2020.103792
	586.1	5.7	0.6	530	Lu-Hf	Ross orogen, Antarctica	Continental	Hagen-Peter et al. (2016)	https://doi.org/10.1111/jmg.12186
	531.7	6.1	0.59	626	Lu-Hf	Ross orogen, Antarctica	Continental	Hagen-Peter et al. (2016)	https://doi.org/10.1111/jmg.12190
	531.4	7	0.68	684	Sm-Nd	Northern Highland and Grampian terranes, Scotland	Continental	Bird et al. (2013)	https://doi.org/10.1144/jgs2012-083
	531.2	7	0.66	661	Sm-Nd	Northern Highland and Grampian terranes, Scotland	Continental	Bird et al. (2013)	https://doi.org/10.1144/jgs2012-083
	519.6	5.3	0.51	639	Lu-Hf	Ross orogen, Antarctica	Continental	Hagen-Peter et al. (2016)	https://doi.org/10.1111/jmg.12194
	517	4	0.61	773	Sm-Nd	Prydz Bay, Antarctica	Continental	Hensen & Zhou (1993)	https://doi.org/10.1080/08120099508728199
	516	5	0.47	710	Sm-Nd	Prydz Bay, Antarctica	Continental	Hensen & Zhou (1993)	https://doi.org/10.1080/08120099508728199
	510	7	0.5	770	Sm-Nd	Prydz Bay, Antarctica	Continental	Hensen & Zhou (1993)	https://doi.org/10.1080/08120099508728199
	509	5	0.64	758	Sm-Nd	Prydz Bay, Antarctica	Continental	Hensen & Zhou (1993)	https://doi.org/10.1080/08120099508728199
	498	12	0.94	904	Sm-Nd	Prydz Bay, Antarctica	Continental	Hensen & Zhou (1995)	https://doi.org/10.1130/0091-7613(1995)023<0225:ROIMIG>2.3.CO;2
	496	12	1	955	Sm-Nd	Prydz Bay, Antarctica	Continental	Hensen & Zhou (1995)	https://doi.org/10.1130/0091-7613(1995)023<0225:ROIMIG>2.3.CO;2
	495.1	8.5	0.74	744	Sm-Nd	Bolangir Anorthosite Complex, India	Continental	Vadlamani (2019)	https://doi.org/10.1086/703463
	488	6	0.67	802	Sm-Nd	Prydz Bay, Antarctica	Continental	Hensen & Zhou (1995)	https://doi.org/10.1130/0091-7613(1995)023<0225:ROIMIG>2.3.CO;2
	486	5.4	1.4	620	Lu-Hf	North Tianshan, Kyrgyzstan	Continental	Rojas-Agramonte et al. (2013)	https://doi.org/10.1007/s00410-013-0889-y
	481	12	0.76	751	Sm-Nd	Bolangir Anorthosite Complex, India	Continental	Vadlamani (2019)	https://doi.org/10.1086/703463
	474.3	22	1.6	610	Lu-Hf	North Tianshan, Kyrgyzstan	Continental	Rojas-Agramonte et al. (2013)	https://doi.org/10.1007/s00410-013-0889-y
	472	10	0.41	751	Sm-Nd	Prydz Bay, Antarctica	Continental	Hensen & Zhou (1995)	https://doi.org/10.1130/0091-7613(1995)023<0225:ROIMIG>2.3.CO;2
	471.7	1.7	0.7	609	Sm-Nd	Northern Highland and Grampian terranes, Scotland	Continental	Bird et al. (2013)	https://doi.org/10.1144/jgs2012-083
	471.5	29	0.69	671	Sm-Nd	Northern Highland and Grampian terranes, Scotland	Continental	Bird et al. (2013)	https://doi.org/10.1144/jgs2012-084
	470.1	2.5	1.6	615	Lu-Hf	North Tianshan, Kyrgyzstan	Continental	Rojas-Agramonte et al. (2013)	https://doi.org/10.1007/s00410-013-0889-y
	469.1	2.7	0.7	673	Sm-Nd	Northern Highland and Grampian terranes, Scotland	Continental	Bird et al. (2013)	https://doi.org/10.1144/jgs2012-085
	467	8	0.42	771	Sm-Nd	Prydz Bay, Antarctica	Continental	Hensen & Zhou (1993)	https://doi.org/10.1080/08120099508728199
	456.5	7.4	0.64	641	Sm-Nd	Northern Highland and Grampian terranes, Scotland	Continental	Bird et al. (2013)	https://doi.org/10.1144/jgs2012-085
	456	7.6	0.65	648	Sm-Nd	Northern Highland and Grampian terranes, Scotland	Continental	Bird et al. (2013)	https://doi.org/10.1144/jgs2012-086
	456	7.4	0.68	700	Sm-Nd	Northern Highland and Grampian terranes, Scotland	Continental	Bird et al. (2013)	https://doi.org/10.1144/jgs2012-087
	455	7.4	0.69	631	Sm-Nd	Northern Highland and Grampian terranes, Scotland	Continental	Bird et al. (2013)	https://doi.org/10.1144/jgs2012-088
	451.4	24	0.67	612	Sm-Nd	Northern Highland and Grampian terranes, Scotland	Continental	Bird et al. (2013)	https://doi.org/10.1144/jgs2012-089
	450.8	5.8	0.66	691	Sm-Nd	Northern Highland and Grampian terranes, Scotland	Continental	Bird et al. (2013)	https://doi.org/10.1144/jgs2012-090
	449.7	2.3	0.65	650	Sm-Nd	Northern Highland and Grampian terranes, Scotland	Continental	Bird et al. (2013)	https://doi.org/10.1144/jgs2012-091
	433.1	1.8	0.63	691	Sm-Nd	Northern Highland and Grampian terranes, Scotland	Continental	Bird et al. (2013)	https://doi.org/10.1144/jgs2012-092
	431.2	6.5	0.69	617	Sm-Nd	Northern Highland and Grampian terranes, Scotland	Continental	Bird et al. (2013)	https://doi.org/10.1144/jgs2012-093
	430.3	4.1	0.69	675	Sm-Nd	Northern Highland and Grampian terranes, Scotland	Continental	Bird et al. (2013)	https://doi.org/10.1144/jgs2012-094
	419.6	1	0.85	715	Lu-Hf	Western Gneiss Region, Norway	Continental	Cutts & Smit (2018)	https://doi.org/10.1002/2017TC004726
	419.5	4.3	2.51	676	Lu-Hf	Western Gneiss Region, Norway	Continental	Kylander-Clark et al. (2007)	https://doi.org/10.1016/j.chemgeo.2007.03.006
	419.5	4.3	2.5	687	Sm-Nd	Western Gneiss Region, Norway	Continental	Kylander-Clark et al. (2007)	https://doi.org/10.1016/j.chemgeo.2007.03.009
	416.3	3.7	1.15	800	Lu-Hf	Western Gneiss Region, Norway	Continental	Kylander-Clark et al. (2007)	https://doi.org/10.1016/j.chemgeo.2007.03.008
	413	57	0.43	671	Sm-Nd	Gyeonggi and Yeongnam massifs, Korea	Continental	Sagong et al. (2003)	https://doi.org/10.1016/S0301-9268(02)00215-2
	412	4.7	2.35	760	Lu-Hf	Western Gneiss Region, Norway	Continental	Kylander-Clark et al. (2007)	https://doi.org/10.1016/j.chemgeo.2007.03.009
	410.5	4.3	2.8	780	Lu-Hf	Western Gneiss Region, Norway	Continental	Cutts & Smit (2018)	https://doi.org/10.1002/2017TC004726
	404.5	7.9	2.8	818	Lu-Hf	Western Gneiss Region, Norway	Continental	Cutts & Smit (2018)	https://doi.org/10.1002/2017TC004730
	402.7	4.6	2.5	850	Sm-Nd	Western Gneiss Region, Norway	Continental	Kylander-Clark et al. (2007)	https://doi.org/10.1016/j.chemgeo.2007.03.009
	400.3	1.5	2.8	780	Lu-Hf	Western Gneiss Region, Norway	Continental	Cutts & Smit (2018)	https://doi.org/10.1002/2017TC004734
	398.5	5.5	2.7	780	Sm-Nd	Western Gneiss Region, Norway	Continental	Kylander-Clark et al. (2007)	https://doi.org/10.1016/j.chemgeo.2007.03.009
	397.8	2.2	2.2	700	Lu-Hf	Huwan shear zone, China	Oceanic	Cheng et al. (2018)	https://doi.org/10.1016/j.chemgeo.2017.11.018
	391.8	6.4	2.23	703	Sm-Nd	Huwan shear zone, China	Oceanic	Cheng et al. (2018)	https://doi.org/10.1016/j.chemgeo.2017.11.018
	391.7	2.3	2.2	700	Lu-Hf	Huwan shear zone, China	Oceanic	Cheng et al. (2018)	https://doi.org/10.1016/j.chemgeo.2017.11.019
	391	75	0.82	696	Sm-Nd	Gyeonggi and Yeongnam massifs, Korea	Continental	Sagong et al. (2003)	https://doi.org/10.1016/S0301-9268(02)00215-2
	388	10	2.3	800	Sm-Nd	Western Gneiss Region, Norway	Continental	Kylander-Clark et al. (2007)	https://doi.org/10.1016/j.chemgeo.2007.03.009
	387.8	2.2	2.2	700	Lu-Hf	Huwan shear zone, China	Oceanic	Cheng et al. (2018)	https://doi.org/10.1016/j.chemgeo.2017.11.020
	387.5	7.6	2.18	692	Sm-Nd	Huwan shear zone, China	Oceanic	Cheng et al. (2018)	https://doi.org/10.1016/j.chemgeo.2017.11.018
	386.8	2.1	2.2	700	Lu-Hf	Huwan shear zone, China	Oceanic	Cheng et al. (2018)	https://doi.org/10.1016/j.chemgeo.2017.11.021
	386.6	4.9	1.1	690	Lu-Hf	Orlica–Śnieżnik Massif, Poland	Continental	Anczkiewicz et al. (2007)	https://doi.org/10.1016/j.lithos.2006.09.001
	386.3	2.2	2.2	700	Lu-Hf	Huwan shear zone, China	Oceanic	Cheng et al. (2018)	https://doi.org/10.1016/j.chemgeo.2017.11.021
	384	11	3.2	825	Sm-Nd	Western Gneiss Region, Norway	Continental	Kylander-Clark et al. (2007)	https://doi.org/10.1016/j.chemgeo.2007.03.009
	381.2	6.7	0.95	704	Sm-Nd	Orlica–Śnieżnik Massif, Poland	Continental	Anczkiewicz et al. (2007)	https://doi.org/10.1016/j.lithos.2006.09.001
	381.2	6.7	1.07	755	Sm-Nd	Orlica–Śnieżnik Massif, Poland	Continental	Anczkiewicz et al. (2007)	https://doi.org/10.1016/j.lithos.2006.09.002
	380.3	2	0.9	600	Sm-Nd	Vermont Appalachians, USA	Continental	Gatewood et al. (2015)	https://doi.org/10.1016/j.chemgeo.2015.02.017
	380	14	3.2	800	Lu-Hf	Western Gneiss Region, Norway	Age inaccuracy	Kylander-Clark et al. (2007)	https://doi.org/10.1016/j.chemgeo.2007.03.009
	377.3	1.4	0.9	600	Sm-Nd	Vermont Appalachians, USA	Continental	Gatewood et al. (2015)	https://doi.org/10.1016/j.chemgeo.2015.02.017
	376.5	1	0.9	600	Sm-Nd	Vermont Appalachians, USA	Continental	Gatewood et al. (2015)	https://doi.org/10.1016/j.chemgeo.2015.02.017
	373.8	4	0.9	650	Lu-Hf	Orlica–Śnieżnik Massif, Poland	Continental	Anczkiewicz et al. (2007)	https://doi.org/10.1016/j.lithos.2006.09.001
	369	11	3.2	825	Lu-Hf	Western Gneiss Region, Norway	Age inaccuracy	Kylander-Clark et al. (2007)	https://doi.org/10.1016/j.chemgeo.2007.03.009
	367.6	5.7	2.25	683	Sm-Nd	Huwan shear zone, China	Oceanic	Cheng et al. (2018)	https://doi.org/10.1016/j.chemgeo.2017.11.018
	364.3	5.4	2.19	663	Sm-Nd	Huwan shear zone, China	Oceanic	Cheng et al. (2018)	https://doi.org/10.1016/j.chemgeo.2017.11.019
	360.6	8.9	2.1	700	Lu-Hf	Adula Nappe, Central Alps	Continental	Sandmann et al. (2014)	https://doi.org/10.1007/s00410-014-1075-6
	358.8	6.6	2.14	715	Sm-Nd	Huwan shear zone, China	Oceanic	Cheng et al. (2018)	https://doi.org/10.1016/j.chemgeo.2017.11.020
	354.2	3.3	1.05	750	Lu-Hf	Orlica–Śnieżnik Massif, Poland	Continental	Anczkiewicz et al. (2007)	https://doi.org/10.1016/j.lithos.2006.09.001
	340.1	4.1	0.9	645	Sm-Nd	Orlica–Śnieżnik Massif, Poland	Continental	Anczkiewicz et al. (2007)	https://doi.org/10.1016/j.lithos.2006.09.002
	323.8	6.9	2.1	700	Lu-Hf	Adula Nappe, Central Alps	Continental	Sandmann et al. (2014)	https://doi.org/10.1007/s00410-014-1075-6
	320.5	3	1	689	Sm-Nd	Orlica–Śnieżnik Massif, Poland	Continental	Anczkiewicz et al. (2007)	https://doi.org/10.1016/j.lithos.2006.09.004
	313.5	1.8	1.9	650	Lu-Hf	Schobergruppe, Austria	Continental	Hauke et al. (2019)	https://doi.org/10.1007/s00531-019-01708-8
	280.3	1	2.2	660	Lu-Hf	Adula Nappe, Central Alps	Continental	Sandmann et al. (2014)	https://doi.org/10.1007/s00410-014-1075-6
	270.6	3	1.2	620	Sm-Nd	Saualpe–Koralpe, Austria	Oceanic	Thöni & Miller (2009)	https://doi.org/10.1016/j.chemgeo.2008.11.017
	270.5	5.5	1.2	620	Sm-Nd	Saualpe–Koralpe, Austria	Oceanic	Thöni & Miller (2009)	https://doi.org/10.1016/j.chemgeo.2008.11.018
	269.9	2.8	1.2	620	Sm-Nd	Saualpe–Koralpe, Austria	Oceanic	Thöni & Miller (2009)	https://doi.org/10.1016/j.chemgeo.2008.11.019
	265.9	1.1	3.7	790	Lu-Hf	Lhasa Block, Tibet	Oceanic	Cheng et al. (2012)	https://doi.org/10.1016/j.lithos.2012.09.015
	263.6	1	1.34	610	Sm-Nd	Saualpe–Koralpe, Austria	Continental	Thöni & Miller (1996)	https://doi.org/10.1046/j.1525-1314.1996.05995.x
	263.5	6.8	2	685	Sm-Nd	Saualpe–Koralpe, Austria	Continental	Thöni (2002)	https://doi.org/10.1016/S0009-2541(01)00410-7
	255.5	1	1.4	600	Sm-Nd	Saualpe–Koralpe, Austria	Continental	Thöni & Miller (1996)	https://doi.org/10.1046/j.1525-1314.1996.05995.x
	254.3	1.8	0.625	600	Sm-Nd	Saualpe–Koralpe, Austria	Continental	Habler et al. (2007)	https://doi.org/10.1016/j.chemgeo.2007.01.026
	252.8	1.8	0.625	600	Sm-Nd	Saualpe–Koralpe, Austria	Continental	Habler et al. (2007)	https://doi.org/10.1016/j.chemgeo.2007.01.026
	248.1	4.7	2	685	Sm-Nd	Saualpe–Koralpe, Austria	Continental	Thöni (2002)	https://doi.org/10.1016/S0009-2541(01)00410-7
	247.6	1.7	0.625	600	Sm-Nd	Saualpe–Koralpe, Austria	Continental	Habler et al. (2007)	https://doi.org/10.1016/j.chemgeo.2007.01.026
	247.1	2.6	0.625	600	Sm-Nd	Saualpe–Koralpe, Austria	Continental	Habler et al. (2007)	https://doi.org/10.1016/j.chemgeo.2007.01.027
	245.4	1.7	0.625	600	Sm-Nd	Saualpe–Koralpe, Austria	Continental	Habler et al. (2007)	https://doi.org/10.1016/j.chemgeo.2007.01.028
	240.1	1.6	0.625	600	Sm-Nd	Saualpe–Koralpe, Austria	Continental	Habler et al. (2007)	https://doi.org/10.1016/j.chemgeo.2007.01.029
	240	5	2.4	670	Sm-Nd	Dabie orogen, China	Continental	Cheng et al. (2018)	https://doi.org/10.1111/j.1525-1314.2008.00785.x
	239.4	1.5	0.625	600	Sm-Nd	Saualpe–Koralpe, Austria	Continental	Habler et al. (2007)	https://doi.org/10.1016/j.chemgeo.2007.01.030
	235.2	1.4	0.625	600	Sm-Nd	Saualpe–Koralpe, Austria	Continental	Habler et al. (2007)	https://doi.org/10.1016/j.chemgeo.2007.01.031
	230.8	5	3.6	705	Sm-Nd	Dabie orogen, China	Only minimum T	Cheng et al. (2018)	https://doi.org/10.1111/j.1525-1314.2008.00785.x
	225.2	5.3	2	685	Sm-Nd	Saualpe–Koralpe, Austria	Continental	Thöni (2002)	https://doi.org/10.1016/S0009-2541(01)00410-7
	225.1	2.7	2	685	Sm-Nd	Saualpe–Koralpe, Austria	Continental	Thöni (2002)	https://doi.org/10.1016/S0009-2541(01)00410-7
	225.1	2.7	2	685	Sm-Nd	Saualpe–Koralpe, Austria	Continental	Thöni (2002)	https://doi.org/10.1016/S0009-2541(01)00410-7
	224.4	1.9	1.8	610	Sm-Nd	Dabie orogen, China	Continental	Cheng et al. (2018)	https://doi.org/10.1111/j.1525-1314.2008.00785.x
	224.2	2.1	3.6	705	Sm-Nd	Dabie orogen, China	Only minimum T	Cheng et al. (2018)	https://doi.org/10.1111/j.1525-1314.2008.00785.x
	223.43	0.92	3	800	Lu-Hf	Dabie-Sulu orogen	Continental	Schmidt et al. (2008)	https://doi.org/10.1016/j.epsl.2008.06.036
	222.94	0.95	3	800	Lu-Hf	Dabie-Sulu orogen	Continental	Schmidt et al. (2008)	https://doi.org/10.1016/j.epsl.2008.06.038
	222.7	1.6	3	800	Lu-Hf	Dabie-Sulu orogen	Continental	Schmidt et al. (2008)	https://doi.org/10.1016/j.epsl.2008.06.041
	222.5	3.7	2.4	670	Sm-Nd	Dabie orogen, China	Continental	Cheng et al. (2018)	https://doi.org/10.1111/j.1525-1314.2008.00785.x
	220.5	2.7	3	800	Lu-Hf	Dabie-Sulu orogen	Continental	Schmidt et al. (2011)	https://doi.org/10.1016/j.lithos.2011.04.004
	219.6	1.4	3	800	Lu-Hf	Dabie-Sulu orogen	Continental	Schmidt et al. (2008)	https://doi.org/10.1016/j.epsl.2008.06.042
	218	1.7	3	800	Lu-Hf	Dabie-Sulu orogen	Continental	Schmidt et al. (2011)	https://doi.org/10.1016/j.lithos.2011.04.004
	217.8	1.2	3	800	Lu-Hf	Dabie-Sulu orogen	Continental	Schmidt et al. (2011)	https://doi.org/10.1016/j.lithos.2011.04.005
	217.8	6.1	1.8	610	Sm-Nd	Dabie orogen, China	Continental	Cheng et al. (2018)	https://doi.org/10.1111/j.1525-1314.2008.00785.x
	215.9	1.3	3	800	Lu-Hf	Dabie-Sulu orogen	Continental	Schmidt et al. (2011)	https://doi.org/10.1016/j.lithos.2011.04.006
	215.77	0.95	3	800	Lu-Hf	Dabie-Sulu orogen	Continental	Schmidt et al. (2011)	https://doi.org/10.1016/j.lithos.2011.04.007
	215	16	0.53	693	Sm-Nd	Gyeonggi and Yeongnam massifs, Korea	Continental	Sagong et al. (2003)	https://doi.org/10.1016/S0301-9268(02)00215-2
	168.7	0.8	0.8	700	Lu-Hf	Franciscan complex, California, USA	Continental	Anczkiewicz et al. (2004)	https://doi.org/10.1016/j.epsl.2004.06.003
	162.5	0.5	0.9	595	Lu-Hf	Franciscan complex, California, USA	Continental	Anczkiewicz et al. (2004)	https://doi.org/10.1016/j.epsl.2004.06.005
	157.9	0.7	1.3	480	Lu-Hf	Franciscan complex, California, USA	Continental	Anczkiewicz et al. (2004)	https://doi.org/10.1016/j.epsl.2004.06.008
	153.4	0.8	0.85	515	Lu-Hf	Franciscan complex, California, USA	Continental	Anczkiewicz et al. (2004)	https://doi.org/10.1016/j.epsl.2004.06.010
	149.6	1.7	0.6	614	Sm-Nd	Saualpe–Koralpe, Austria	Continental	Habler et al. (2007)	https://doi.org/10.1016/j.chemgeo.2007.01.031
	146.7	0.7	0.8	700	Lu-Hf	Franciscan complex, California, USA	Continental	Anczkiewicz et al. (2004)	https://doi.org/10.1016/j.epsl.2004.06.011
	144.6	0.9	1.4	850	Lu-Hf	Xigaze Ophiolite, Tibet	Oceanic	Guilmette et al. (2023)	https://doi.org/10.1038/s43247-023-01007-w
	144.3	3.5	1.4	850	Lu-Hf	Xigaze Ophiolite, Tibet	Oceanic	Guilmette et al. (2023)	https://doi.org/10.1038/s43247-023-01007-w
	143.7	0.7	1.4	850	Lu-Hf	Xigaze Ophiolite, Tibet	Oceanic	Guilmette et al. (2023)	https://doi.org/10.1038/s43247-023-01007-w
	140.1	4.5	1.4	850	Lu-Hf	Xigaze Ophiolite, Tibet	Oceanic	Guilmette et al. (2023)	https://doi.org/10.1038/s43247-023-01007-w
	114.5	0.6	0.95	695	Lu-Hf	Franciscan complex, California, USA	Continental	Anczkiewicz et al. (2004)	https://doi.org/10.1016/j.epsl.2004.06.015
	104.5	3.5	0.6	850	Lu-Hf	Halilbağı Complex, Turkey	Oceanic	Pourteau et al. (2019)	https://doi.org/10.1016/j.gsf.2018.03.004
	104.1	1.1	1.1	800	Lu-Hf	Semail Ophiolite, Oman	Oceanic	Guilmette et al. (2018)	https://doi.org/10.1038/s41561-018-0209-3
	103.5	1.6	1.1	800	Lu-Hf	Semail Ophiolite, Oman	Oceanic	Guilmette et al. (2018)	https://doi.org/10.1038/s41561-018-0209-2
	103.2	1.2	1.1	800	Lu-Hf	Semail Ophiolite, Oman	Oceanic	Guilmette et al. (2018)	https://doi.org/10.1038/s41561-018-0209-4
	96.92	0.82	1.9	650	Lu-Hf	Schobergruppe, Austria	Continental	Hauke et al. (2019)	https://doi.org/10.1007/s00531-019-01708-8
	96.6	1.2	3.1	765	Lu-Hf	Pohorje Mountains, Slovenia	Oceanic	Sandmann et al. (2016)	https://doi.org/10.1016/j.lithos.2016.08.004
	94.8	5.1	3.1	765	Lu-Hf	Pohorje Mountains, Slovenia	Oceanic	Sandmann et al. (2016)	https://doi.org/10.1016/j.lithos.2016.08.007
	94	27	2.04	689	Sm-Nd	Saualpe–Koralpe, Austria	Continental	Thöni & Miller (1996)	https://doi.org/10.1046/j.1525-1314.1996.05995.x
	93	1.8	2	685	Sm-Nd	Saualpe–Koralpe, Austria	Continental	Thöni (2002)	https://doi.org/10.1016/S0009-2541(01)00410-7
	93	1.8	2	685	Sm-Nd	Saualpe–Koralpe, Austria	Continental	Thöni (2002)	https://doi.org/10.1016/S0009-2541(01)00410-7
	92.38	0.22	2.6	525	Lu-Hf	Halilbağı Complex, Turkey	Oceanic	Pourteau et al. (2019)	https://doi.org/10.1016/j.gsf.2018.03.007
	91.6	4.1	3.1	765	Lu-Hf	Pohorje Mountains, Slovenia	Oceanic	Sandmann et al. (2016)	https://doi.org/10.1016/j.lithos.2016.08.010
	90.9	0.7	1.9	682	Sm-Nd	Saualpe–Koralpe, Austria	Continental	Thöni & Miller (1996)	https://doi.org/10.1046/j.1525-1314.1996.05995.x
	90.3	0.5	2	680	Sm-Nd	Saualpe–Koralpe, Austria	Continental	Thöni & Miller (1996)	https://doi.org/10.1046/j.1525-1314.1996.05995.x
	90.19	0.54	2.6	525	Lu-Hf	Halilbağı Complex, Turkey	Oceanic	Pourteau et al. (2019)	https://doi.org/10.1016/j.gsf.2018.03.005
	90.1	1.5	2	685	Sm-Nd	Saualpe–Koralpe, Austria	Continental	Thöni (2002)	https://doi.org/10.1016/S0009-2541(01)00410-7
	90	3	2	685	Sm-Nd	Saualpe–Koralpe, Austria	Continental	Thöni (2002)	https://doi.org/10.1016/S0009-2541(01)00410-7
	89.5	2.3	2.01	675	Sm-Nd	Saualpe–Koralpe, Austria	Continental	Thöni & Miller (1996)	https://doi.org/10.1046/j.1525-1314.1996.05995.x
	88.5	1.7	2.1	678	Sm-Nd	Saualpe–Koralpe, Austria	Continental	Thöni & Miller (1996)	https://doi.org/10.1046/j.1525-1314.1996.05995.x
	87.3	0.39	2.6	525	Lu-Hf	Halilbağı Complex, Turkey	Oceanic	Pourteau et al. (2019)	https://doi.org/10.1016/j.gsf.2018.03.006
	87	3.1	2	685	Sm-Nd	Saualpe–Koralpe, Austria	Continental	Thöni (2002)	https://doi.org/10.1016/S0009-2541(01)00410-7
	86.8	3.3	2.1	425	Lu-Hf	Halilbağı Complex, Turkey	Oceanic	Pourteau et al. (2019)	https://doi.org/10.1016/j.gsf.2018.03.008
	80	9	0.9	700	Sm-Nd	Coastal Mountains, Alaska	Continental	Stowell & Goldberg (2004)	https://doi.org/10.1111/j.1525-1314.1997.00025.x
	77	17	0.9	700	Sm-Nd	Coastal Mountains, Alaska	Continental	Stowell & Goldberg (2004)	https://doi.org/10.1111/j.1525-1314.1997.00025.x
	68	3.6	1.5	780	Lu-Hf	d'Entrecasteaux Island, Papua New Guinea	Continental	Zirakparvar et al. (2011)	https://doi.org/10.1016/j.epsl.2011.06.020
	62	4	0.9	700	Sm-Nd	Coastal Mountains, Alaska	Continental	Stowell & Goldberg (2004)	https://doi.org/10.1111/j.1525-1314.1997.00025.x
	59	12	0.9	700	Sm-Nd	Coastal Mountains, Alaska	Continental	Stowell & Goldberg (2004)	https://doi.org/10.1111/j.1525-1314.1997.00025.x
	58.2	1.4	2	550	Lu-Hf	Theodul Glacier Unit, Switzerland	Oceanic	Weber et al. (2015)	https://doi.org/10.1007/s00015-015-0180-5
	57.9	1.5	2	550	Lu-Hf	Theodul Glacier Unit, Switzerland	Oceanic	Weber et al. (2015)	https://doi.org/10.1007/s00015-015-0180-8
	56.5	2.7	2	550	Lu-Hf	Theodul Glacier Unit, Switzerland	Oceanic	Weber et al. (2015)	https://doi.org/10.1007/s00015-015-0180-11
	56.4	2.8	2	550	Lu-Hf	Theodul Glacier Unit, Switzerland	Oceanic	Weber et al. (2015)	https://doi.org/10.1007/s00015-015-0180-14
	50.3	0.3	2.65	580	Lu-Hf	Theodul Glacier Unit, Switzerland	Oceanic	Bovay et al. (2021)	https://doi.org/10.1111/jmg.12623
	49.6	0.8	2.65	580	Lu-Hf	Theodul Glacier Unit, Switzerland	Oceanic	Bovay et al. (2021)	https://doi.org/10.1111/jmg.12624
	48.8	0.1	2.65	580	Lu-Hf	Theodul Glacier Unit, Switzerland	Oceanic	Bovay et al. (2021)	https://doi.org/10.1111/jmg.12625
	48.8	3.2	2	550	Sm-Nd	Syros, Greece	Oceanic	Kendall (2016)	https://core.ac.uk/download/pdf/151480478.pdf
	48.1	2.3	2	550	Sm-Nd	Syros, Greece	Oceanic	Kendall (2016)	https://core.ac.uk/download/pdf/151480478.pdf
	44.7	1	2	550	Sm-Nd	Syros, Greece	Oceanic	Kendall (2016)	https://core.ac.uk/download/pdf/151480478.pdf
	43.6	1.6	2	550	Sm-Nd	Syros, Greece	Oceanic	Kendall (2016)	https://core.ac.uk/download/pdf/151480478.pdf
	35.1	0.2	1.1	670	Lu-Hf	Likhu Kola, Nepal	Oceanic	Shrestha et al. (2017)	https://doi.org/10.1111/jmg.12252
	34.7	0.05	1.1	690	Lu-Hf	Likhu Kola, Nepal	Oceanic	Shrestha et al. (2017)	https://doi.org/10.1111/jmg.12254
	34	0.05	1.1	650	Lu-Hf	Likhu Kola, Nepal	Oceanic	Shrestha et al. (2017)	https://doi.org/10.1111/jmg.12251
	27.8	0.2	0.9	680	Lu-Hf	Likhu Kola, Nepal	Oceanic	Shrestha et al. (2017)	https://doi.org/10.1111/jmg.12253
	27.52	0.54	0.9	550	Sm-Nd	Syros, Greece	Oceanic	Pollington & Baxter (2010)	https://doi.org/10.1016/j.epsl.2010.02.019
	26.84	0.5	0.9	550	Sm-Nd	Syros, Greece	Oceanic	Pollington & Baxter (2010)	https://doi.org/10.1016/j.epsl.2010.02.020
	26.73	0.46	0.9	550	Sm-Nd	Syros, Greece	Oceanic	Pollington & Baxter (2010)	https://doi.org/10.1016/j.epsl.2010.02.021
	26.65	0.5	0.9	550	Sm-Nd	Syros, Greece	Oceanic	Pollington & Baxter (2010)	https://doi.org/10.1016/j.epsl.2010.02.022
	26.61	0.56	0.9	550	Sm-Nd	Syros, Greece	Oceanic	Pollington & Baxter (2010)	https://doi.org/10.1016/j.epsl.2010.02.023
	25.45	0.55	0.9	550	Sm-Nd	Syros, Greece	Oceanic	Pollington & Baxter (2010)	https://doi.org/10.1016/j.epsl.2010.02.024
	24.85	0.67	0.9	550	Sm-Nd	Syros, Greece	Oceanic	Pollington & Baxter (2010)	https://doi.org/10.1016/j.epsl.2010.02.025
	24.36	0.64	0.9	550	Sm-Nd	Syros, Greece	Oceanic	Pollington & Baxter (2010)	https://doi.org/10.1016/j.epsl.2010.02.026
	23.81	0.64	0.9	550	Sm-Nd	Syros, Greece	Oceanic	Pollington & Baxter (2010)	https://doi.org/10.1016/j.epsl.2010.02.027
	22.78	0.64	0.9	550	Sm-Nd	Syros, Greece	Oceanic	Pollington & Baxter (2010)	https://doi.org/10.1016/j.epsl.2010.02.028
	21.71	0.59	0.9	550	Sm-Nd	Syros, Greece	Oceanic	Pollington & Baxter (2010)	https://doi.org/10.1016/j.epsl.2010.02.029
	19.97	0.43	0.9	550	Sm-Nd	Syros, Greece	Oceanic	Pollington & Baxter (2010)	https://doi.org/10.1016/j.epsl.2010.02.030
	16.76	0.45	0.65	575	Lu-Hf	Likhu Kola, Nepal	Oceanic	Shrestha et al. (2017)	https://doi.org/10.1111/jmg.12250
	11.2	2.1	1.5	780	Lu-Hf	d'Entrecasteaux Island, Papua New Guinea	Continental	Zirakparvar et al. (2011)	https://doi.org/10.1016/j.epsl.2011.06.020
	7.9	1.9	1.4	700	Lu-Hf	d'Entrecasteaux Island, Papua New Guinea	Continental	Zirakparvar et al. (2011)	https://doi.org/10.1016/j.epsl.2011.06.029
	All P-T data from the cited paper or those cited in it. Regional peak P-T estimates are taken for continental UHP terranes
	Zircon data (see Holder et al., 2019)
	Age	2sd	P	T	Method		Notes	Reference
	3669	---	0.8	860	U-Pb	Islands south of Nuuk, southwest Greenland	Continental	Authors P-T estimate (unpubl.); Horie et al. (2010)
	2819	---	1	900	U-Pb	BIF, Voronezh Crystalline Massif, Volgo-Uralia	Continental	Savko et al. (2010); Fonarev et al. (2006)
	2805	---	0.81	865	U-Pb	515190/515183, Lower zone, Sermilik block, Tasiusarsuaq terrane, southern West Greenland	Continental	Dziggel et al (2012); Crowley (2002)
	2760	---	1.05	915	U-Pb	512073, Lower zone, Bjornesund block, Tasiusarsuaq terrane, southern West Greenland	Continental	Dziggel et al. (2017)
	2751	---	0.6	640	U-Pb	Tre Brødre terrane, southern West Greenland	Continental	Dzieggel et al. (2014)
	2742	---	0.8	760	U-Pb	Helge Halvo, Skjoldungen, SE Greenland	Continental	Tusch et al. (2015); Berger et al. (2014)
	2730	---	0.5	838	U-Pb	Mkhondo Valley metamorphic suite, Ancient Gneiss Complex, Swaziland	Continental	Taylor et al. (2010)
	2718	---	0.95	780	U-Pb	Paradise Basin, Wind River Range, Wyoming, USA	Continental	Keane et al. (2006); Donohue and Essene (2005)
	2715	---	1.05	1000	U-Pb	Granulite xenolith, Grace kimberlite pipe, South Africa	Continental	Dawson et al. (1997); Schmitz and Bowring (2003); Baldwin et al. (2007)
	2700	---	0.67	840	U-Pb	Minto block, Superior Province, Canada (average 7 samples)	Continental	Pattison et al. (2003)
	2700	---	0.65	810	U-Pb	English River Domain, Superior Province, Canada (average 7 samples)	Continental	Pattison et al. (2003)
	2697	---	1.2	950	U-Pb	Northern Teton Range, Wyoming, USA	Continental	Frost et al. (2007, 2009)
	2680	---	0.9	850	U-Pb	Varpaisjärvi, central Finland	Continental	Höltä and Paavola (2000); Mäntäri and Höltä (2002); Nehring et al. (2009)
	2675	---	0.78	880	U-Pb	Ashuanipi Complex, Superior Province, Canada (average 10 samples)	Continental	Pattison et al., 2003
	2660	---	0.8	880	U-Pb	Quetico Metasedimentary Belt, Superior Province, Canada (average 6 samples)	Continental	Pattison et al. (2003)
	2645	---	0.6	760	U-Pb	Dangin, near Quairading, Grace terrane, Yilgarn craton	Continental	Wilde (1994); Nemchin et al. (1994); Lindsley (1983)
	2636	---	0.35	590	U-Pb	Nevoria, Southern Cross greenstone belt, Yilgarn craton	Continental	Mueller et al. (2004)
	2636	---	0.6	740	U-Pb	Griffins Find, southwestern Southern Cross Province, Yilgarn craton	Continental	Barnicoat et al. (1991)
	2620	---	1	777	U-Pb	Kapuskasing structural zone, Superior Province, Canada (average 4 samples)	Continental	Bowman et al., 2011; Pattison et al., 2003
	2582	---	0.8	800	U-Pb	Ayyarmalai, northeastern Madurai Province, South India	Continental	Raith et al. (2016)
	2564	---	0.6	620	U-Pb	Hutti-Maski greenstone belt, eastern Dharwar craton, India	Continental	Hazarika et al. (2015)
	2546	---	0.46	600	U-Pb	South Kolar greenstone belt, eastern Dharwar craton, India	Continental	Hazarika et al. (2015)
	2530	---	0.93	840	U-Pb	Karnataka, Dharwar Craton, India (average 7 samples)	Continental	Pattison et al. (2003); Mojzsis et al. (2003); Friend and Nutman (1992)
	2500	---	0.85	860	U-Pb	Charnockite, Madras block, southern India	Continental	Pattison et al. (2003); Santosh et al. (2003)
	2500	---	0.8	1050	U-Pb	Mt Riiser–Larsen, Napier Complex, E Antarctica	Continental	Hokada et al. (2008; 2004; 2003)
	2499	---	1.3	850	U-Pb	Quarry, Louzishan village, Jidong terrane, eastern North China Craton	Continental	Lu et al. (2017)
	2455	---	0.65	800	U-Pb	Shoal Point, S Gawler craton, South Australia	Continental	Dutch et al., 2010
	2450	---	0.9	800	U-Pb	Terre Adélie, E Antarctica	Continental	Duclaux et al. (2008); Ménot et al. (2005)
	2350	---	0.56	718	U-Pb	Southern Boothia Peninsula, northern Rae craton, Canada	Continental	Berman et al. (2013a)
	2350	---	0.67	850	U-Pb	McCann Lake, southern Rae craton, Canada	Continental	Berman et al. (2013a)
	2130	---	0.55	630	U-Pb	0108, El Cristo Hill-San Veran Hill, southeastern Tandilia belt, Rio de la Plata craton, Argentina	Continental	Martinez et al. (2017)
	2086	---	0.75	925	U-Pb	Itabuna-Salvador-Curaçá Block, São Francisco craton, Brazil	Continental	Peucat et al. (2011); Leite et al. (2009)
	2070	---	0.67	670	U-Pb	Metapelite, Cinco Cerros area, southeastern Tandilia belt, Rio de la Plata craton, Argentina	Continental	Massonne et al. (2012)
	2045	---	0.78	980	U-Pb	Jequié Block, São Francisco craton, Brazil	Continental	Barbosa et al. (2006, 2004)
	1990	---	0.72	875	U-Pb	Glenburgh gold deposit, Glenburgh Terrane, southern Gascoyne Province, Western Australia	Continental	Roche et al. (2017)
	1940	---	0.67	930	U-Pb	Taltson Magmatic Zone, Canada (average 15 samples)	Continental	Card et al. (2014); Pattison et al., 2003
	1930	---	1.36	775	U-Pb	Pingdu-Anqiu area, Jiaobei massif, Jiao-Liao-Ji belt, North China Craton	Continental	Liu et al. (2017)
	1915	---	0.91	950	U-Pb	Xiaoshizi, Jining Complex, Khondalite Belt, North China craton	Continental	Jiao et al. (2013a, 2013b)
	1910	---	0.7	1000	U-Pb	Heling'er, Jining Complex, Khondalite Belt, North China craton	Continental	Santosh et al. (2013); Liu et al. (2012)
	1910	---	1.05	900	U-Pb	Umba granulite belt, Russian Federation	Continental	Aranovich et al. (2010); Daly et al. (2001)
	1870	---	1.15	1000	U-Pb	Mollendo-Camana Block, Arequipa-Antofalla Basement, central Andean Margin	Continental	Casquet et al. (2010); Martingole and Martelat (2003)
	1861	---	0.74	770	U-Pb	Bell Peninsula, Southampton Island, Nunavut	Continental	Berman et al. (2013b)
	1860	---	1.31	810	U-Pb	Mafic enclaves, Pingyang trondhjemite, Fuping terrane, TNCO, North china Craton	Continental	Meng et al. (2017)
	1854	---	1.2	950	U-Pb	Weihai, northern Sulu belt, China	Continental	Xiang et al. (2014)
	1850	---	0.8	900	U-Pb	Tasiuyak gneiss, Makhavinekh Lake, northern Labrador, Canada	Continental	Mitchell et al. (2014); McFarlane et al. (2005)
	1848	---	0.71	780	U-Pb	Duke of York Bay, Southampton Island, Nunavut	Continental	Berman et al. (2013b)
	1848	---	1.48	820	U-Pb	Manjinggou, Huai'an Complex, North China Craton	Continental	Wu et al. (2016); Zhao et al. (2008)
	1835	---	1.15	880	U-Pb	Xiwangshan area, Xuanhua Complex, TNCO, North China Craton	Continental	Huang et al. (2018)
	1830	---	1	875	U-Pb	North of Fuping, Fuping Complex, TNCO, North China Craton	Continental	Tang et al. (2017)
	1830	---	2.4	735	U-Pb	Eclogite, Kovik tectonic window, Trans-Hudson orogen, Canada	Continental	Weller and St-Onge (2017)
	1826	---	0.5	930	U-Pb	Lujiaying, TNCO, North China Craton	Continental	Yang et al. (2014)
	1824	---	0.6	830	U-Pb	Turku, southern Finland	Continental	Johannes et al. (2003); Väisänen et al. (2002)
	1820	---	1.15	815	U-Pb	Mafic granulite, Qianxi, Eastern Hebei, North China craton	Continental	Duan et al. (2018; 2015)
	1800	---	0.4	800	U-Pb	Zone 4, Mount Stafford, central Australia	Continental	Rubatto et al. (2006); White et al. (2003)
	1790	---	0.58	940	U-Pb	Pelite Zone, Ketilidian Belt, Greenland (average 9 samples)	Continental	Pattison et al. (2003); Garde et al. (2002); Dempster et al. (1991)
	1731	---	0.6	850	U-Pb	Magnetite gneisses, Warramboo, southeastern Gawler craton, Australia	Continental	Morrissey et al. (2016); Lane et al. (2015)
	1720	---	0.85	820	U-Pb	Shoal Point, S Gawler craton, South Australia	Continental	Dutch et al. (2010)
	1700	---	0.76	798	U-Pb	Mt Hay block, Arunta complex, central Australia	Continental	Waters-Tormey et al. (2016); Claoue-Long and Hoatson (2005)
	1646	---	0.93	950	U-Pb	Wilson Lake terrane, Labrador, Canada	Continental	Korhonen et al. (2012)
	1366	---	1.1	820	U-Pb	?	Unknown provenance	---
	1322	---	0.45	950	U-Pb	Contact aureole, Makhavinekh Lake pluton, northern Labrador, Canada	Continental	Mitchell et al. (2014); McFarlane et al. (2005, 2003)
	1200	---	0.5	900	U-Pb	Kakamas terrane, central Namaqua metamorphic complex, South Africa	Continental	Bial et al. (2015)
	1200	---	0.75	1000	U-Pb	Western Musgrave Province, Western Australia	Continental	Walsh et al (2015); Smithies et al. (2011)
	1190	---	0.63	900	U-Pb	Eastern Musgrave Province, South Australia	Continental	Tucker et al. (2015b)
	1183	---	0.865	913	U-Pb	Highjump Archipelago, East Antarctica	Continental	Tucker and Hand (2016)
	1156	---	0.92	820	U-Pb	Adirondack Highlands, Grenville Province, North America (average 11 samples)	Continental	Peck et al. (2010); Pattison et al. (2003)
	1135	---	2	790	U-Pb	Jordan Ranch, Llano uplift, Texas	Continental	Carlson et al. (2007)
	1130	---	0.55	810	U-Pb	Haasts Bluff domain, Warumpi Province, central Australia	Continental	Wong et al. (2015)
	1015	---	0.7	965	U-Pb	Garzon Massif, Colombia	Continental	Altenberger et al. (2012); Cordani et al. (2005)
	1000	---	1	900	U-Pb	Sostrene Island, Larsemann Hills, Prydz Bay, E Antarctica	Continental	Wang et al. (2008); Hensen et al. (1995); Hensen and Zhou (1995)
	970	---	1.8	870	U-Pb	Varberg eclogite	Continental	Tual et al. (2018); Johansson et al. (2001)
	950	---	0.9	830	U-Pb	Vestfold Hills, Prydz Bay, East Antarctica	Continental	Liu et al. (2014)
	945	---	0.68	800	U-Pb	Mawson Escarpement, Southern Prince Charles Mountains, East Antarctica	Continental	Phillips et al. (2009); Corvino et al. (2008)
	930	---	0.65	865	U-Pb	Northern Prince Charles Mountains, East Antarctica	Continental	Morrissey et al. (2015)
	788	---	1	810	U-Pb	NE margin Tarim craton, Tibet	Continental	He et al. (2012)
	755	---	1.15	320	U-Pb	Meta-ironstone, Aksu blueschist terrane, western China	Oceanic	Xia et al. (2018); Yong et al. (2013); Zhang et al. (1999)
	754	---	0.8	980	U-Pb	Barro Alto complex, Northern Brasília Belt, Brazil	Continental	Giustina et al. (2011); Moraes et al. (2006); Moraes and Fuck (2000)
	685	---	1.96	694	U-Pb	Tighsi, Egere terrane, Central Hoggar, Algeria	Continental	Doukkari et al. (2014); Liégeois et al. (2003)
	685	---	2	670	U-Pb	Adrar Izzilatène, Egere terrane, Central Hoggar, Algeria	Continental	Doukkari et al. (2015); Liégeois et al. (2003)
	650	---	3	900	U-Pb	Três Pontas-Varginha Nappe, southern Brasília Belt, Brazil	Mantle provenance	Reno et al. (2012); Parkinson et al. (2001)
	621	---	1.1	860	U-Pb	Guaxupé Nappe, southern Brasília Belt, Brazil	Continental	Salazar Mora et al. (2014); Motta Garcia and Campos Neto (2003)
	620	---	2	723	U-Pb	Eclogite, Richarddalen Complex, Biscayarhalvøya, Spitsbergen	Continental	Elvevold et al. (2013); Dallmeyer et al. (1990b); Peucat et al. (1989)
	615	---	2.8	770	U-Pb	Forquilha eclogite zone, NW Borborema Province, NE Brazil	Continental	Santos et al. (2009); Ganade de Araujo et al. (2014); Santos et al. (2015)
	611	---	3.2	720	U-Pb	Eclogite, Gourma Nappe complex, northern Mali	Oceanic	Ganade de Araujo et al. (2014); Caby (1994)
	609	---	2.9	710	U-Pb	Eclogite, Lato Hills, south Togo	Oceanic	Ganade de Araujo et al. (2014); Agbossoumonde et al. (2001)
	560	---	0.65	850	U-Pb	Kanjampara, central Trivandrum block (Kerala Khondalite Belt), India	Continental	Harley and Nandakumar (2016)
	545	---	0.7	865	U-Pb	McKaskle Hills, East Amery Ice Shelf, East Antarctica	Continental	Morrissey et al. (2016)
	529	---	0.825	747	U-Pb	Gjelsvikfjella, Central Maud belt, East Antarctica	Continental	Bisnath et al. (2006, 2005)
	520	---	0.5	750	U-Pb	Central Damara Belt, Namibia	Continental	Longridge et al. (2014); Ward et al. (2008); Jung and Mezger (2003)
	520	---	0.49	520	U-Pb	Southeast of Ida dome, Swakop River, southwestern Central Zone, Damara Belt, Namibia	Continental	Longridge et al. (2017)
	515	---	0.63	810	U-Pb	Taylor/Brocklehurst/Meredith, Northern Prince Charles Mountains, East Antarctica	Continental	Morrissey et al. (2016)
	511	---	1.8	630	U-Pb	Collingwood River, Franklin Metamorphic Complex, Tasmania	Continental	Palmeri et al. (2009); Black et al. (1997)
	510	---	0.85	860	U-Pb	Madras Granulites, India (average 8 samples)	Continental	Pattison et al. (2003)
	510	---	2.5	725	U-Pb	Eclogite, Lanterman Range, Northern Victoria Land, Antarctica	Continental	Di Vincenzo et al. (2016)
	500	---	2.9	830	U-Pb	South-west Altyn Tagh, China	Continental	Liu et al. (2012)
	494	---	2.75	700	U-Pb	Eclogite, North Qinling, China	Continental	Cheng et al. (2012)
	490	---	2.7	590	U-Pb	Port Macquarie, New South Wales, Australia	Oceanic	Tamblyn et al. (2017, Pers. Comm.)
	490	---	3.5	689	U-Pb	Dia eclogite, North Qinling, China	Oceanic	Wang et al. (2014)
	489	---	2.25	490	U-Pb	North Altyn Tagh, China	Oceanic	Zhang et al. (2007); Zhang & Meng (2006); Zhang et al. (2005)
	482	---	3	700	U-Pb	Tjidtjak eclogite, Norrbotten, Sweden	Oceanic	Bukala et al. (2018); Root and Corfu (2012)
	477	---	0.66	825	U-Pb	Migmatite, Sierra de Valle Fértil, Famatinian magmatic arc, Argentina	Continental	Tibaldi et al. (2011); Ducea et al. (2010)
	475	---	2	600	U-Pb	Eclogite, upper unit, Motalafjella, Spitsbergen	Continental	Bernard-Griffiths et al. (1993); Hirajima et al. (1988)
	472	---	2.3	530	U-Pb	Port Macquarie, New South Wales, Australia	Oceanic	Tamblyn et al. (2017, Pers. Comm.)
	471	---	2.55	620	U-Pb	Jaeren nappe, SW Norway	Oceanic	Smit et al. (2010, 2008)
	470	---	1.55	400	U-Pb	Lawsonite/carpholite blueschists, lower unit, Motalafjella, Spitsbergen	Oceanic	Agard et al. (2005); Dallmeyer et al. (1990a); Hirajima et al. (1984)
	470	---	1.6	480	U-Pb	Blueschist, Nordenskiöld Land, Spitsbergen	Oceanic	Kosminska et al. (2014)
	462	---	1.05	880	U-Pb	Harts Range meta-igneous Complex, central Australia	Continental	Tucker et al. (2015a); Maidment et al. (2013)
	460	---	3.5	815	U-Pb	Stor Jougdan, Seve Nappe Complex, Sweden	Mixed provenance, outermost marginal or oceanic	Klonowska et al. (2016); Brueckner and van Roermund (2007)
	458	---	2.6	700	U-Pb	Tjeliken eclogite, Seve nappe complex, Sweden	Mixed provenance, outermost marginal or oceanic	Fassmer et al. (2017)
	445	---	3.68	892	U-Pb	North Dulan, North Qaidam, NW China	Mixed provenance, arc?	Han et al. (2015); Song et al. (2014); Chen et al. (2018)
	442	---	2.8	710	U-Pb	Ky-Grt gneiss, Areskutan, Seve nappe complex, Sweden	Continental	Klonowska et al. (2014); Klonowska et al. (2017); Ladenberger et al. (2014)
	435	---	2.95	770	U-Pb	Xitieshan, North Qaidam, NW China	Continental	Song et al. (2014); Zhang et al. (2011)
	433	---	3.01	652	U-Pb	Coe eclogite block, Yuka, North Qaidam, NW China	Continental	Zhang et al. (2016; 2009)
	430	---	0.7	800	U-Pb	Wilmington complex, Delaware, USA	Continental	Aleinikoff et al. (2006); Srogi et al. (1993)
	412	---	3	660	U-Pb	Roche L'Abeille, Limousin, Massif Central, France	Oceanic	Berger et al. (2010)
	408	---	2.8	750	U-Pb	Monts du Lyonnais, Massif Central, France	Oceanic	Lardeaux et al. (2001); Paquette et al. (1995)
	405	---	3.25	815	U-Pb	Harøya, Nordøyane, Western Gneiss Region, Norway	Continental	Cutts and Smit (2018); Kohn et al. (2015); Butler et al. (2013)
	405	---	3.3	820	U-Pb	Fjørtoft, Nordøyane, Western Gneiss Region, Norway	Continental	Cutts and Smit (2018); Kohn et al. (2015); Terry et al. (2000)
	405	---	3.3	700	U-Pb	Nordfjord, Western Gneiss Region, Norway	Continental	Cutts and Smit (2018); Kohn et al. (2015); Young et al. (2007)
	399	---	2.65	665	U-Pb	Lofoten, Norway	Continental	Froitzheim et al. (2016)
	399	---	2.5	800	U-Pb	Liverpool Land, East Greenland	Continental	Corfu and Hartz (2011); Hartz et al. (2005)
	388	---	3.2	680	U-Pb	Maksyutov Complex, southern Urals	Continental	Leech and Willingshofer (2004); Bostick et al. (2003); Leech and Ernst (1998)
	387	---	2.7	875	U-Pb	Stary Gieraltów, Śnieżnik Mountains, southwest Poland	Continental	Ferrero et al. (2015); Anczkiewicz et al. (2007); Bröcker and Klemd (1996)
	387	---	2.5	685	U-Pb	Mariánské-Lázne complex, Bohemian Massif, Czech Republic	Continental	Collett et al. (2018)
	384	---	3	725	U-Pb	Eclogite, Munchberg Massif, Germany	Continental	Liebscher et al. (2007); Stosch and Lugmair (1990)
	376	---	2.4	630	U-Pb	Eclogite boudins in gneisses, Malpica-Tui Complex, NW Spain	Oceanic	Puelles et al. (2017); Li et al. (2017)
	370	---	2.1	715	U-Pb	Międzygórze, Śnieżnik Mountains, southwest Poland	Continental	Štípská et al. (2012); Bröcker et al. (2010)
	365	---	1.9	450	U-Pb	Ile de Groix, Armorican Massif, France	Oceanic	Bosse et al. (2005); Ballèvre et al. (2003)
	360	---	1	1000	U-Pb	Northeastern Connecticut, USA	Continental	Axler and Ague (2015a, b); Ague et al. (2013)
	355	---	1.6	550	U-Pb	Low-T eclogite, La Varenne, Champtoceaux complex, Armorican massif, France	Continental	Paquette et al. (2017); Bosse et al. (2000); Ballevre and Marchand (1991)
	351	---	2.3	490	U-Pb	Asalem metamorphic complex, western Alborz, Iran	Oceanic	Rossetti et al. (2017)
	346	---	0.7	740	U-Pb	Fosdick migmatite-granite complex, Marie Byrd Land, Antarctica	Continental	Yakymchuk et al. (2015); Korhonen et al. (2012)
	342	---	3.8	970	U-Pb	Kyanite eclogite, T-7 borehole, Ceske stredohori Mtns, Bohemian Massif, Czech Republic	Mantle provenance	Kotková and Janak (2015); Gebauer (1991)
	318	---	2.6	450	U-Pb	Omphacite blueschist (TS1309b), Kebuerte Valley, southwestern Tienshan, China	Oceanic	Soldner et al. (2017)
	316	---	1.1	910	U-Pb	Ivrea zone, Italy	Continental	Ewing et al., 2013; Redler et al., 2012
	315	---	2.9	490	U-Pb	Meta-siliciclastic rocks, Habutengsu Valley, southwestern Tienshan, China	Oceanic	Lü et al. (2012); Klemd et al. (2011)
	315	---	1.8	605	U-Pb	Eclogite, Shanderman, northern Iran	Oceanic	Omrani et al. (2013); Zanchetta et al. (2009)
	301	---	1.85	490	U-Pb	Retrogressed eclogite, Chatkal Range, South Tien Shan, Kyrgystan	Oceanic	Loury et al. (2016)
	299	---	0.65	655	U-Pb	Altai, Chinese Altai, Central Asian orogenic belt, China	Continental	Wang et al. (2014)
	280	---	0.825	950	U-Pb	Kalasu, Chinese Altai, Central Asian orogenic belt, China	Continental	Yang et al. (2015); Tong et al. (2014)
	277	---	0.9	950	U-Pb	Fuyun, Chinese Altai, Central Asian orogenic belt, China	Continental	Li et al. (2014)
	265	---	3.6	770	U-Pb	Eclogite, Jilang, Lhasa block, Tibet	Oceanic	Cheng et al. (2012)
	261	---	2.7	730	U-Pb	Eclogite, Songdo, Lhasa block, Tibet	Oceanic	Zhang and Tang (2009); Yang et al. (2007)
	247	---	2.1	520	U-Pb	Hongyike, north of Tongbai Mtns, China	Continental	Cheng et al. (2011)
	247	---	2.35	530	U-Pb	Retrograded eclogite, Badu complex, Cathaysia block, South China	Oceanic	Zhao et al. (2017)
	242	---	1	390	U-Pb	Blueschist, Lancang tectonic belt, Southwest China	Oceanic	Fan et al. (2015)
	242	---	1.05	375	U-Pb	Lawsonite blueschist, northwestern Qiangtang, Tibet	Oceanic	Tang and Zhang (2014)
	239.5	---	2.25	570	U-Pb	Kangjiawan, Hong'an zone, Dabie orogen, China	Continental	Cheng et al. (2010)
	239	---	2.25	435	U-Pb	Gangma Co, central Qiangtang, Tibet	Oceanic	Zhai et al. (2011); Pullen et al. (2008)
	236	---	3	660	U-Pb	Weihai, Sulu belt, China	Continental	Zong et al. (2010); Banno et al. (2000)
	236	---	3.1	800	U-Pb	Taohang, Sulu belt, China	Continental	Li et al. (2014); Nakamura and Hirajima (2010); Yao et al. (2000)
	234	---	6	800	U-Pb	Bixiling mafic-ultramafic complex, south Dabieshan, China	Mantle provenance	Liu & Liou (2011); Zhang et al. (1995)
	234	---	6	830	U-Pb	Maobei mafic-ultramafic complex, CCSD main hole, Sulu belt, China	Mantle provenance	Liu & Liou (2011); Zhang et al. (2010)
	233	---	3.55	600	U-Pb	Marble, Sanqingge, Sulu belt, China	Pressure estimate debated, based on Arg+Mgs, see Smit et al., 2008	Zhu et al. (2009); Liu et al. (2007)
	230	---	2.6	490	U-Pb	Bailang eclogite, Lhasa block, Tibet	Oceanic	Cheng et al. (2015)
	230	---	3.25	650	U-Pb	Eclogite, Donghai, Sulu belt, China	Continental	Zong et al. (2010); Mattinson et al. (2004)
	227	---	4.25	970	U-Pb	Luotian, North Dabie zone, China	Unclear provenance	Liu et al. (2015, 2011a, 2011b, 2007)
	223	---	1.4	520	U-Pb	Rongma, central Qiangtang, Tibet	Continental	Pullen et al. (2008); Kapp et al. (2003)
	218	---	2.55	536	U-Pb	Pinchi Lake, British Columbia, Canada	Oceanic	Wei and Clarke (2011); Ghent et al. (2009)
	201	---	4.05	745	U-Pb	Chepelare melange, Rhodope zone, Greece	Oceanic	Petrík et al. (2016)
	190	---	4	990	U-Pb	Eclogite, Basu, Qiangtang, central Tibet	Oceanic	Zhang et al. (2008)
	184	---	2.4	550	U-Pb	Eclogite, North Shahrekord, Sanandaj-Sirjan zone, Iran	Oceanic	Davoudian et al. (2016)
	162	---	1.2	750	U-Pb	Lazaro unit, Diego de Almagro Island, Patagonia	Oceanic	Angiboust et al. (2017)
	158	---	2.35	585	U-Pb	Eclogite, Ring Mountain, Tiburon Peninsular, California, USA	Oceanic	Tsujimori et al. (2006a); Anczkiewicz et al. (2004)
	154	---	1.8	504	U-Pb	Cazadero, Northern California, USA	Oceanic	Wei and Clarke (2011); Wakabayashi and Dumitru (2007)
	145	---	2.2	435	U-Pb	Jenner, Northern California, USA	Oceanic	Anczkiewicz et al. (2004); Ravna and Terry (2004)
	140	---	1.7	614	U-Pb	Metabasite block (SN-86), Siuna, Northeastern Nicaragua	Continental	Flores et al. (2015)
	118	---	2.2	440	U-Pb	Luk Ulo complex, central Java, Indonesia	Oceanic	Bröcker et al. (2017); Kadarusman et al. (2007)
	105	---	2.35	440	U-Pb	Central Pontide supercomplex (sample178), Pontides, Turkey	Oceanic	Aygul and Oberhansli (2017); Okay et al. (2006)
	105	---	1.75	420	U-Pb	Central Pontide supercomplex (sample775), Pontides, Turkey	Oceanic	Aygul and Oberhansli (2017); Okay et al. (2006)
	105	---	1.7	475	U-Pb	Central Pontide supercomplex (sample 753), Pontides, Turkey	Oceanic	Aygul and Oberhansli (2017); Okay et al. (2006)
	104	---	2.3	585	U-Pb	Jagua Clara melange, Rio San Juan complex, Dominican Republic	Oceanic	Escuder-Viruete et al. (2013); Krebs et al. (2008)
	101	---	2.4	670	U-Pb	Eclogite, southern Chuacús complex, central Guatemala	Continental	Maldonado et al. (2018)
	92	---	0.7	900	U-Pb	Lower crustal xenoliths, Kakanui mineral breccia, Otago, New Zealand	Continental	Jacob et al. (2017)
	92	---	3.7	820	U-Pb	Pohorje Mountains, Eastern Alps, Slovenia	Oceanic	Sandmann et al. (2016); Janák et al. (2015, 2009); Thoni et al. (2008)
	89	---	2.4	700	U-Pb	Quartz eclogite unit, central Shikoku, Sanbagawa belt, Japan	Continental	Miyamoto et al. (2007; Wallis et al. (2009)
	89	---	2.15	650	U-Pb	Seba eclogite unit,central Shikoku, Sanbagawa belt, Japan	Continental	Kabir and Takasu (2010); Wallis et al. (2009)
	88	---	2	600	U-Pb	Jadeite-garnet-glaucophasne schsits, Bizan area, Sanbagawa belt, Japan	Continental	Kabir and Takasu (2016); Wallis et al. (2009)
	85	---	1.7	530	U-Pb	Alanya massif, southeastern Turkey	Continental	Çetinkaplan et al. (2016)
	84	---	0.75	700	U-Pb	Kirşehir-Hirkadağ massifs, Central Anatolia, Turkey	Continental	Lefebvre et al. (2015); Whitney and Hamilton (2004)
	83	---	2	520	U-Pb	Bitlis massif, southeastern Turkey	Oceanic	Oberhänsli et al. (2013)
	81	---	1.3	460	U-Pb	Iranshahr blueschist, inner Makran accretionary prism	Oceanic	Omrani et al. (2017); Delaloye and Desmons (1980)
	80	---	1.65	540	U-Pb	Blueschist, Almagro HP-LT complex, Diego de Almagro Island, Patagonia	Oceanic	Hyppolito et al. (2016)
	69	---	1.85	550	U-Pb	Sancti Spiritus dome, Escambray massif, central Cuba	Continental	Grevel et al. (2006); Schneider et al. (2004)
	65	---	0.74	900	U-Pb	Crustal xenoliths, Prindle volcano, Alaska	Continental	Ghent et al. (2008)
	51	---	2.8	645	U-Pb	Tso-Morari eclogite, western Himalaya, India	Oceanic	St-Onge et al. (2013)
	51	---	2.5	750	U-Pb	Stak eclogite, Haramosh, NE Himalaya, Pakistan	Continental	Lanari et al. (2013); Riel et al. (2008)
	49	---	2.3	470	U-Pb	Roboaro River, Voltri Massif, Ligurian Alps	Oceanic	Scarsi et al. (2017); Federico et al. (2005)
	48	---	1.45	570	U-Pb	Blueschist clast, serpentine mud volvano, Mariana forearc	Oceanic	Tamblyn et al. (2018); Zack et al. (2013)
	47	---	0.75	650	U-Pb	Yardoi dome, southeastern Tibet	Continental	Ding et al. (2016)
	47	---	3.3	710	U-Pb	Eclogite, Kaghan Valley, NW Himalaya, Pakistan	Oceanic	Wilke et al. (2010a, b)
	45	---	1.3	480	U-Pb	Kurudere, southern Menderes massif, southwestern Turkey	Continental	Pourteau et al. (2013); Rimmele et al. (2005)
	45	---	2.7	550	U-Pb	Lago Superiore unit, Monviso, Western Alps	Oceanic	Angiboust et al. (2012); Rubatto & Hermann (2003)
	44	---	2.5	550	U-Pb	Eclogite, Pouébo terrane (Zone 4), northern New Caledonia	Oceanic	Brovarone and Agard (2013); Spandler et al. (2005)
	44	---	1.9	580	U-Pb	Balma unit (Zermatt-Saas zone), Western Alps	Oceanic	Herwartz et al. (2008)
	43	---	2.55	560	U-Pb	Gressoney valley, Monte Rosa nappe, Western Alps	Oceanic	Gasco et al. (2011); Lapen et al. (2007)
	39	---	1.9	540	U-Pb	Lws blueschist, Diahot terrane (Zone 2), northern New Caledonia	Oceanic	Brovarone and Agard (2013); Pirard and Spandler (2017)
	37	---	2.5	750	U-Pb	Trescolmen, Adula nappe, Western Alps	Continental	Herwartz et al. (2011); Dale & Holland (2003)
	36	---	0.9	785	U-Pb	Jomolhari massif, western Bhutan	Continental	Regis et al (2014)
	35	---	4	730	U-Pb	Brossasco-Isasca unit (Dora-Maira Massif), Western Alps	Oceanic	Castelli et al. (2007); Groppo et al. (2007); Hermann (2003); Rubatto and Hermann (2001); Gebauer et al. (1997)
	34	---	2	520	U-Pb	Gran Paradiso Massif, Western Alps	Oceanic	Manzotti et al. (2015); Gabudianu Radulescu et al. (2009);
	34	---	2.3	520	U-Pb	Schistes Lustrés, Corsica, France	Oceanic	Brovarone and Herwartz (2013); Brovarone et al. (2011); Martin et al. (2011)
	31	---	1.25	370	U-Pb	Gimigliano, lower ophiolitic unit, Catena Costiera, Calabria, Italy	Oceanic	Rossetti et al. (2004)
	30	---	1.15	1020	U-Pb	Lower crustal xenoliths, central Mexico	Continental	Hayob et al. (1993, 1989); Rudnick and Cameron (1991)
	28	---	0.83	692	U-Pb	Hunza Valley, Karakoram metamorphic complex, Pakistan	Continental	Palin et al. (2012)
	28	---	0.7	720	U-Pb	Sill-Kfs metatexite, Upper GHC, Nylam, central Himalaya, China	Continental	Wang et al. (2013, 2015)
	25	---	0.845	875	U-Pb	Granulite xenoliths,Kilbourne Hole/Potrillo volcanic field, New Mexico, USA	Continental	Scherer et al. (1997); Hamblock et al. (2007); Bohlen et al. (1983)
	21	---	3.6	750	U-Pb	Footwall of the Kef Lakhal thrust, Edough Massif, Algeria	Oceanic	Bruguier et al. (2017); Caby et al. (2014)
	8.1	---	2	770	U-Pb	Eclogite, Wandamen Peninsula, Western papua	Continental	François et al. (2016)
	7	---	2.8	720	U-Pb	Fergusson Island, eastern Papua New Guinea	Continental	Kohn et al. (2015); Zirakparvar et al. (2011); Baldwin et al. (2008)
	5	---	1.65	540	U-Pb	Yuli belt, eastern Taiwan	Continental	Keyser et al. (2016); Sandmann et al. (2015)
	Zircon data - Archean (see Kuang et al., 2023)
	Age	2sd	P	T	Method	Location	Notes	Reference
	3669	---	0.8	860	U-Pb	Islands south of Nuuk, southwest Greenland	Continental	see Kuang et al. (2023)
	3658	---	1.25	870	U-Pb	Locality G11/24, northern terrane, Isua, southwest Greenland	No actual P given just preliminary above 1 Gpa	see Kuang et al. (2023)
	3560	---	0.8	620	U-Pb	Zone C/D, northeastern Isua Supracrustal Belt, southwest Greenland	Continental	see Kuang et al. (2023)
	3481	---	0.95	675	U-Pb	Onverwacht Group greenstone, Barberton region, South Africa	Continental	see Kuang et al. (2023)
	3443	---	0.88	603.5	U-Pb	Sandspruit Formation, South Africa	Continental	see Kuang et al. (2023)
	3418.8	---	0.68	711.5	U-Pb	Sandspruit Formation, South Africa	Continental	see Kuang et al. (2023)
	3311.9	---	1.07	540	U-Pb	East Pilbara Granite–Greenstone Terrane, Western Australia	Continental	see Kuang et al. (2023)
	3280.9	---	0.85	668	U-Pb	Inyoni shear zone, Barberton region, South Africa	Continental	see Kuang et al. (2023)
	3248.8	---	1.055	665	U-Pb	Inyoni shear zone, Barberton region, South Africa	Continental	see Kuang et al. (2023)
	3237	---	0.825	695	U-Pb	Inyoni Shear Zone (ISZ), southwestern Barberton Greenstone Belt, South Africa	Continental	see Kuang et al. (2023)
	3233	---	0.75	625	U-Pb	within the central Stolzburg terrane, South Africa	Continental	see Kuang et al. (2023)
	3230	---	1.35	625	U-Pb	Inyoni shear zone, Barberton region, South Africa	One sample, untested and different from all other estimates	see Kuang et al. (2023)
	3230	---	1.15	760	U-Pb	Inyoni shear zone, Barberton region, South Africa	Continental	see Kuang et al. (2023)
	3229	---	0.7	537	U-Pb	Tjakastad schist belt, Barberton region, South Africa	Continental	see Kuang et al. (2023)
	3228.5	---	0.3	420	U-Pb	drill site KD1, Kromberg Area, South Africa	Continental	see Kuang et al. (2023)
	3226.3	---	1.405	731	U-Pb	Sandspruit Formation, South Africa	One sample, untested and different from all other estimates	see Kuang et al. (2023)
	3223.1	---	0.465	657	U-Pb	Dwalile, South Africa (general), South Africa	Continental	see Kuang et al. (2023)
	3222.3	---	0.945	652.5	U-Pb	Sandspruit Formation, South Africa	Continental	see Kuang et al. (2023)
	3219	---	0.6	491	U-Pb	Stolzburg schist belt, Barberton region, South Africa	Continental	see Kuang et al. (2023)
	3201	---	0.9	650	U-Pb	Inyoni shear zone, Barberton region, South Africa	Continental	see Kuang et al. (2023)
	3191	---	0.7	625	U-Pb	within the central Stolzburg terrane, South Africa	Continental	see Kuang et al. (2023)
	3178	---	1.05	1000	U-Pb	Voronezh Crystalline Massif, Sarmatia	Continental	see Kuang et al. (2023)
	3110	---	0.705	852.5	U-Pb	Luboya-Kubuta terrane, south-central Swaziland	Continental	see Kuang et al. (2023)
	3070	---	0.85	925	U-Pb	Enderby Land, Napier, Antarctica	Continental	see Kuang et al. (2023)
	3070	---	0.505	872.5	U-Pb	Kubuta granulites, Ancient Gneiss Complex, Swaziland	Continental	see Kuang et al. (2023)
	3009	---	0.7	850	U-Pb	Maniitsoq, Akia terranes, North Atlantic Craton, West Greenland	Continental	see Kuang et al. (2023)
	2923	---	0.85	625	U-Pb	La France Formation	Continental	see Kuang et al. (2023)
	2920	---	0.82	600	U-Pb	Finlayson Lake greenstone belt, Superior Province, Canada	Continental	see Kuang et al. (2023)
	2857	---	0.9	845	U-Pb	Imartorngup tima, West Greenland	Continental	see Kuang et al. (2023)
	2850	---	1.05	820	U-Pb	Buksefjorden area, West Greenland	Continental	see Kuang et al. (2023)
	2817	---	0.47	673	U-Pb	Yerrabali schist belt, Eastern Dharwar craton, India	Continental	see Kuang et al. (2023)
	2812.5	---	0.75	850	U-Pb	Tasiusarsuaq terrane, Nuuk area, Greenland	Continental	see Kuang et al. (2023)
	2800	---	0.89	780	U-Pb	Godthab-Fiskenaesset region, southern West Greenland	Continental	see Kuang et al. (2023)
	2800	---	0.775	780	U-Pb	Godthåbsfjord region, southern West Greenland	Continental	see Kuang et al. (2023)
	2782	---	0.36	615	U-Pb	Diemals Belt, Yilgarn Craton	Continental	see Kuang et al. (2023)
	2780	---	1.9	630	U-Pb	Bundelkhand craton, India	White schist marine and age uncertainty	see Kuang et al. (2023)
	2770	---	0.825	825	U-Pb	Qeqertasugssuk, West Greenland	Continental	see Kuang et al. (2023)
	2760	---	1.0675	907.5	U-Pb	512073, Lower zone, Bjornesund block, Tasiusarsuaq terrane, southern West Greenland	Continental	see Kuang et al. (2023)
	2751	---	0.6	640	U-Pb	Tre Brødre terrane, Nuuk area, Greenland	Continental	see Kuang et al. (2023)
	2748	---	0.65	650	U-Pb	Merolia, Yilgarn Craton	Continental	see Kuang et al. (2023)
	2742	---	0.8	760	U-Pb	Helge Halvo, Skjoldungen, SE Greenland	Continental	see Kuang et al. (2023)
	2740	---	1	780	U-Pb	Sermilik, Lower zone, Sermilik block, Tasiusarsuaq terrane, southern West Greenland	Continental	see Kuang et al. (2023)
	2733	---	1.025	1007.5	U-Pb	Lac Peters area, northern Quebec, Canada	Continental	see Kuang et al. (2023)
	2730	---	0.44	840	U-Pb	Mkhondo Valley metamorphic suite, Ancient Gneiss Complex, Swaziland	Continental	see Kuang et al. (2023)
	2728	---	0.64	575	U-Pb	Cue Belts, Yilgarn Craton	Continental	see Kuang et al. (2023)
	2724	---	0.4	556	U-Pb	Dalgaranga, Yalgoo Belts, Yilgarn Craton	Continental	see Kuang et al. (2023)
	2720	---	1.11	852.5	U-Pb	Southern Marginal Zone, Limpopo Belt, southern Africa	Continental	see Kuang et al. (2023)
	2717.5	---	1	1050	U-Pb	Kaapvaal craton, Southern Africa	Continental	see Kuang et al. (2023)
	2715	---	1	725	U-Pb	inner Ameralik area, Nuuk, Greenland	Continental	see Kuang et al. (2023)
	2715	---	0.975	710	U-Pb	island Qilanngaarssuit, Nuuk area, Greenland	Continental	see Kuang et al. (2023)
	2702	---	0.685	770	U-Pb	Minto block, in northern Quebec, Canada	Continental	see Kuang et al. (2023)
	2700	---	1.45	900	U-Pb	Cnoc an t’Sidhean, NW Scotland	P-T different from regional and hinging on missing opx	see Kuang et al. (2023)
	2700	---	1.4	1000	U-Pb	Scourie–Stoer (Scourie More), Central Region, Lewisian Complex, NW Scotland	P-T not published	see Kuang et al. (2023)
	2700	---	0.88	672	U-Pb	north-eastern part of the Ungava Orogen, Canada	Continental	see Kuang et al. (2023)
	2700	---	1.05	810	U-Pb	Tiree island, Scotland	Continental	see Kuang et al. (2023)
	2700	---	0.8	815	U-Pb	Wind River Range, Wyoming., U.S.A	Continental	see Kuang et al. (2023)
	2700	---	0.65	810	U-Pb	English River Domain, Superior Province, Canada (average 7 samples)	Continental	see Kuang et al. (2023)
	2700	---	0.67	840	U-Pb	Minto block, Superior Province, Canada (average 7 samples)	Continental	see Kuang et al. (2023)
	2697	---	0.73	575	U-Pb	Laverton, Kurnalpi Terrane, Yilgarn Craton	Continental	see Kuang et al. (2023)
	2697	---	1.2	950	U-Pb	Northern Teton Range, Wyoming, USA	Continental	see Kuang et al. (2023)
	2694.8	---	1.2	900	U-Pb	Teton Range, Wyoming Province, USA	Continental	see Kuang et al. (2023)
	2692	---	0.85	975	U-Pb	Minto block, in northern Quebec, Canada	Continental	see Kuang et al. (2023)
	2691	---	0.9	850	U-Pb	Southern Marginal Zone, Limpopo Belt, South Africa	Continental	see Kuang et al. (2023)
	2691	---	0.5	722.5	U-Pb	English River subprovince, Ontario, Canada	Continental	see Kuang et al. (2023)
	2688	---	0.85	580	U-Pb	Coolgardie, Kalgoorlie Terrane, Yilgarn Craton	Continental	see Kuang et al. (2023)
	2686	---	0.285	562.5	U-Pb	Mougooderra Formation, Youanmi Terrane, Yilgarn Craton	Continental	see Kuang et al. (2023)
	2685	---	0.56	630	U-Pb	Polelle Group, Youanmi Terrane, Yilgarn Craton	Continental	see Kuang et al. (2023)
	2685	---	0.7	850	U-Pb	Paintbrush Canyon, Wyoming Province, USA	Continental	see Kuang et al. (2023)
	2684.8	---	0.7	690	U-Pb	Teton Range, Wyoming Province, USA	Continental	see Kuang et al. (2023)
	2680	---	0.9	900	U-Pb	Natawahunan Lake, Pikwitonei granulite domain, NW Superior Province, Canada	Continental	see Kuang et al. (2023)
	2680	---	0.675	785	U-Pb	northern Wyoming Province, USA	Continental	see Kuang et al. (2023)
	2677.5	---	0.6	700	U-Pb	Jean Lake area, Quetico, Canada	Continental	see Kuang et al. (2023)
	2677.3	---	0.8	985	U-Pb	Pikwitonei Granulite Domain, Manitoba, Canada	Continental	see Kuang et al. (2023)
	2675	---	0.95	780	U-Pb	Paradise Basin area,, Wind River Range, Wyoming., U.S.A	Continental	see Kuang et al. (2023)
	2675	---	0.78	880	U-Pb	Ashuanipi Complex, Superior Province, Canada (average 10 samples)	Continental	see Kuang et al. (2023)
	2670	---	0.5	700	U-Pb	Wind River Range, Wyoming Province, USA	Continental	see Kuang et al. (2023)
	2669	---	0.5	725	U-Pb	Quetico Subprovince, Manitouwadge, Ontario, Canada	Continental	see Kuang et al. (2023)
	2668	---	0.77	765	U-Pb	Southern Marginal Zone, Limpopo Belt, South Africa	Continental	see Kuang et al. (2023)
	2667	---	0.68	780	U-Pb	eastern Beartooth Mountains, Wyoming Province, USA	Continental	see Kuang et al. (2023)
	2660	---	1.2	800	U-Pb	209029, Waroonga shear zone, western Yilgarn craton, Australia	Continental	see Kuang et al. (2023)
	2660	---	1.1	850	U-Pb	Kapuskasing Structural Zone (KSZ), Ontario, Canada	Continental	see Kuang et al. (2023)
	2660	---	0.8	880	U-Pb	Quetico Metasedimentary Belt, Superior Province, Canada (average 6 samples)	Continental	see Kuang et al. (2023)
	2659	---	0.42	725	U-Pb	Mt Narryer, Yilgarn Craton	Continental	see Kuang et al. (2023)
	2657.5	---	0.55	575	U-Pb	Pontiac Subprovince, Superior craton, Canada	Continental	see Kuang et al. (2023)
	2649	---	0.4	567	U-Pb	Bulong, Belches Fm, Yilgarn Craton	Continental	see Kuang et al. (2023)
	2645	---	0.8	600	U-Pb	Plutonic Well Greenstone Belt, Marymia Inlier, Western Australia	Continental	see Kuang et al. (2023)
	2645	---	0.6	760	U-Pb	Dangin, near Quairading, Grace terrane, Yilgarn craton	Continental	see Kuang et al. (2023)
	2644	---	0.85	845	U-Pb	Bulai pluton, Central Zone, Limpopo Belt, southern Africa	Continental	see Kuang et al. (2023)
	2638	---	0.64	852	U-Pb	Lake Grace Belt	Continental	see Kuang et al. (2023)
	2636	---	0.6	740	U-Pb	Griffins Find, southwestern Southern Cross Province, Yilgarn craton	Continental	see Kuang et al. (2023)
	2636	---	0.35	590	U-Pb	Nevoria, Southern Cross greenstone belt, Yilgarn craton	Continental	see Kuang et al. (2023)
	2635	---	0.625	852.5	U-Pb	Griffin’s Find gold deposit, southern Western Australia	Continental	see Kuang et al. (2023)
	2632	---	0.67	710	U-Pb	Sample EB45, migmatitic orthogneiss, Elu volcanic belt, Canadian Shield	Continental	see Kuang et al. (2023)
	2631	---	0.22	490	U-Pb	Dalgaranga Belts, Yilgarn Craton	Continental	see Kuang et al. (2023)
	2630	---	0.61	790	U-Pb	Wind River Range, Wyoming Province, USA	Continental	see Kuang et al. (2023)
	2626.4	---	0.46	784	U-Pb	Mt Narryer, Yilgarn Craton	Continental	see Kuang et al. (2023)
	2624	---	0.36	577	U-Pb	Southern Cross Belt, Southern Cross Domain, Yilgarn Craton	Continental	see Kuang et al. (2023)
	2622	---	1	1050	U-Pb	Uweinat-Kamil basement inlier, east Sahara ghost craton, SW Egypt	Continental	see Kuang et al. (2023)
	2620	---	1	777	U-Pb	Kapuskasing structural zone, Superior Province, Canada (average 4 samples)	Continental	see Kuang et al. (2023)
	2610	---	1.5	1000	U-Pb	East Athabasca mylonite triangle, Saskatchewan, Canada	Continental	see Kuang et al. (2023)
	2600	---	1.5	965	U-Pb	Felsic granulite, Upper deck domain, Athabasca granulite terrane, Snowbird tectonic zone, Canada	Continental	see Kuang et al. (2023)
	2600	---	0.95	940	U-Pb	Basement Complex, Congo Craton	Continental	see Kuang et al. (2023)
	2599	---	0.65	825	U-Pb	Anton/Snare River Domains, Western Slave Craton, Canada	Continental	see Kuang et al. (2023)
	2582	---	0.8	800	U-Pb	Ayyarmalai, northeastern Madurai Province, South India	Continental	see Kuang et al. (2023)
	2582	---	0.75	920	U-Pb	Talerulik, West Greenland	Continental	see Kuang et al. (2023)
	2575	---	0.9	827	U-Pb	Snowbird Tectonic Zone/East Athabasca terrane, Western Canada	Continental	see Kuang et al. (2023)
	2571	---	0.8	627	U-Pb	West margin, Southwest Terrane, Yilgarn Craton	Continental	see Kuang et al. (2023)
	2570	---	0.3575	950	U-Pb	Agasanahalli village, Dharwar Craton, southern Peninsular India	Continental	see Kuang et al. (2023)
	2564	---	0.6	620	U-Pb	Hutti-Maski greenstone belt, eastern Dharwar craton, India	Continental	see Kuang et al. (2023)
	2557	---	1.15	760	U-Pb	Majorqaq belt, North Atlantic Craton, southern West Greenland	Continental	see Kuang et al. (2023)
	2552	---	1.05	1050	U-Pb	Dashihe, Qianxi, Eastern Hebei, North China Craton	Continental	see Kuang et al. (2023)
	2550	---	1.3	900	U-Pb	Chipman domain, Snowbird tectonic zone, Canada	Continental	see Kuang et al. (2023)
	2550	---	0.45	525	U-Pb	Southern West Greenland	Continental	see Kuang et al. (2023)
	2547	---	1.55	800	U-Pb	Qôrqut Granite Complex, West Greenland	Continental	see Kuang et al. (2023)
	2546	---	0.46	600	U-Pb	South Kolar greenstone belt, eastern Dharwar craton, India	Continental	see Kuang et al. (2023)
	2546	---	0.925	1025	U-Pb	Tonagh Island, Napier Complex, Antarctica	Continental	see Kuang et al. (2023)
	2545	---	1.25	1100	U-Pb	Mt Charles, Napier Complex, Antarctica	Continental	see Kuang et al. (2023)
	2541	---	1.4	950	U-Pb	Athabasca granulite terran, northern Saskatchewan, Canada	Continental	see Kuang et al. (2023)
	2539	---	1.45	875	U-Pb	Nilgiri Hills, India	Continental	see Kuang et al. (2023)
	2532	---	1.9	950	U-Pb	Nilgiri Block, southern India	Pyroxenites	see Kuang et al. (2023)
	2532	---	0.97	551	U-Pb	Dengfeng, North China Craton	Continental	see Kuang et al. (2023)
	2530	---	0.93	840	U-Pb	Karnataka, Dharwar Craton, India (average 7 samples)	Continental	see Kuang et al. (2023)
	2528	---	2.235	839	U-Pb	Zunhua-Shanying, North China	Oceanic	see Kuang et al. (2023)
	2526	---	2.2	980	U-Pb	Kolli-massif, southern India	Orogenic peridotite	see Kuang et al. (2023)
	2525	---	0.75	725	U-Pb	Northwestern Hearne Province/ Chesterfield Block, Canada	Continental	see Kuang et al. (2023)
	2520	---	1.25	855	U-Pb	Yinshan Block, North China Craton	Continental	see Kuang et al. (2023)
	2519	---	0.855	825	U-Pb	Southern Jilin, North China Craton, China	Continental	see Kuang et al. (2023)
	2507	---	1.27	760	U-Pb	Miyun, North China Craton	Continental	see Kuang et al. (2023)
	2507	---	1.15	1050	U-Pb	Andriamena, Madagascar	Continental	see Kuang et al. (2023)
	2504	---	0.89	532	U-Pb	Dengfeng, North China Craton	Continental	see Kuang et al. (2023)
	2502	---	1.05	1000	U-Pb	Andriamena, Madagascar	Continental	see Kuang et al. (2023)
	2501	---	0.98	858	U-Pb	Miyun, North China Craton	Continental	see Kuang et al. (2023)
	2501	---	0.95	985	U-Pb	Yangyashan, Qianan, Eastern Hebei, North China Craton	Continental	see Kuang et al. (2023)
	2500	---	1.1	850	U-Pb	Miyun-Chengde, North China Craton, China	Continental	see Kuang et al. (2023)
	2500	---	0.995	880	U-Pb	Taipingzhai, Eastern Hebei, North China Craton	Continental	see Kuang et al. (2023)
	2500	---	0.825	810	U-Pb	Linjiaguanzhuang, Yishui terrane, Eastern block, North China craton	Continental	see Kuang et al. (2023)
	2500	---	0.825	825	U-Pb	Huadian, Southern Jilin, China	Continental	see Kuang et al. (2023)
	2500	---	0.85	860	U-Pb	Charnockite, Madras block, southern India	Continental	see Kuang et al. (2023)
	2500	---	0.9	950	U-Pb	Scourie–Achiltibuie (Strathan), Central Region, Lewisian Complex, NW Scotland	Continental	see Kuang et al. (2023)
	2500	---	0.82	883	U-Pb	Dengfeng, North China Craton	Continental	see Kuang et al. (2023)
	2500	---	0.72	810	U-Pb	Kasai craton, Zaire	Continental	see Kuang et al. (2023)
	2500	---	0.8	1050	U-Pb	Mt Riiser–Larsen, Napier Complex, E Antarctica	Continental	see Kuang et al. (2023)
